# Supplementary material for: Exploiting a silver–bismuth hybrid material as heterogeneous noble metal catalyst for decarboxylations and decarboxylative deuterations of carboxylic acids under batch and continuous flow conditions
Source: Royal Society of Chemistry journal article supplement (doi:10.1039/d1gc00924a), 2021-01-01
Supplement: d1gc00924a1.pdf [file d1gc00924a1.pdf]

## SUPPORTING INFORMATION

for

### **Exploiting a Silver–Bismuth Hybrid Material as Heterogeneous Noble Metal Catalyst for Decarboxylations and Decarboxylative Deuterations of Carboxylic Acids under Batch and Continuous Flow Conditions**

Rebeka Mészáros<sup>a</sup>, András Márton<sup>b</sup>, Márton Szabados<sup>b,c</sup>, Gábor Varga<sup>\*,c,d</sup>, Zoltán Kónya<sup>e,f</sup>,  
Ákos Kukovecz<sup>e</sup>, Ferenc Fülöp<sup>\*,a,g</sup>, István Pálinkó<sup>†,b,c</sup> and Sándor B. Ötvös<sup>\*,g,h</sup>

<sup>a</sup>*Institute of Pharmaceutical Chemistry, University of Szeged, Eötvös u. 6, Szeged, H-6720 Hungary.*

<sup>b</sup>*Department of Organic Chemistry, University of Szeged, Dóm tér 8, Szeged, H-6720 Hungary.*

<sup>c</sup>*Material and Solution Structure Research Group and Interdisciplinary Excellence Centre, Institute of Chemistry, University of Szeged, Aradi Vértanúk tere 1, Szeged, H-6720 Hungary.*

<sup>d</sup>*Department of Physical Chemistry and Materials Science, University of Szeged, Rerrich Béla tér 1, Szeged, H-6720 Hungary. E-mail: gabor.varga5@chem.u-szeged.hu*

<sup>e</sup>*Department of Applied and Environmental Chemistry, University of Szeged, Rerrich Béla tér 1, Szeged, H-6720 Hungary*

<sup>f</sup>*MTA-SZTE Reaction Kinetics and Surface Chemistry Research Group, Rerrich Béla tér 1, Szeged, H-6720 Hungary*

<sup>g</sup>*MTA-SZTE Stereochemistry Research Group, Hungarian Academy of Sciences, Eötvös u. 6, Szeged, H-6720.*

*E-mail: fulop@pharm.u-szeged.hu*

<sup>h</sup>*Institute of Chemistry, University of Graz, NAWI Graz, Heinrichstrasse 28, Graz, A-8010 Austria.*

*E-mail: sandor.oetvoes@uni-graz.at*

<sup>†</sup>*Deceased*

*\*Corresponding authors*

## Table of Contents

|                                                          |            |
|----------------------------------------------------------|------------|
| <b>1. Additional Figures and Tables.....</b>             | <b>S3</b>  |
| <b>2. Analytical Data of the Reaction Products .....</b> | <b>S5</b>  |
| <b>3. Collection of NMR Spectra .....</b>                | <b>S10</b> |
| <b>4. References .....</b>                               | <b>S53</b> |

## 1. Additional Figures and Tables

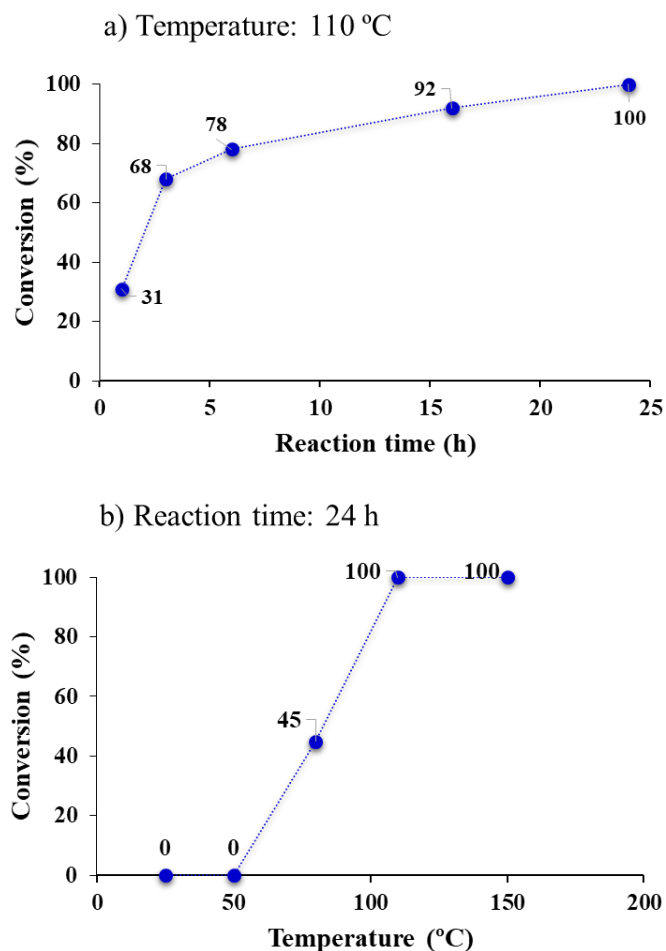

**Fig. S1** Investigation of the effects of the temperature (a) and reaction time (b) on the AgBi-HM-catalyzed decarboxylation of 2-nitrobenzoic acid. (Reaction conditions: 0.15 M substrate concentration, 5 mol% catalyst, 15 mol% of KOH as base, DMF as solvent.)

**Table S1** Investigation of the effects the substrate concentration in the AgBi-HM-catalyzed decarboxylation of 2-nitrobenzoic acid under batch conditions.

| Entry | c (M) | Conversion (%) <sup>a</sup> | Selectivity (%) <sup>a</sup> |   |
|-------|-------|-----------------------------|------------------------------|---|
|       |       |                             | A                            | B |
| 1     | 0.25  | 63                          | 100                          | 0 |
| 2     | 0.2   | 86                          | 100                          | 0 |
| 3     | 0.15  | 100                         | 100                          | 0 |
| 4     | 0.1   | 100                         | 100                          | 0 |

<sup>a</sup>Determined by <sup>1</sup>H NMR analysis of the crude product.

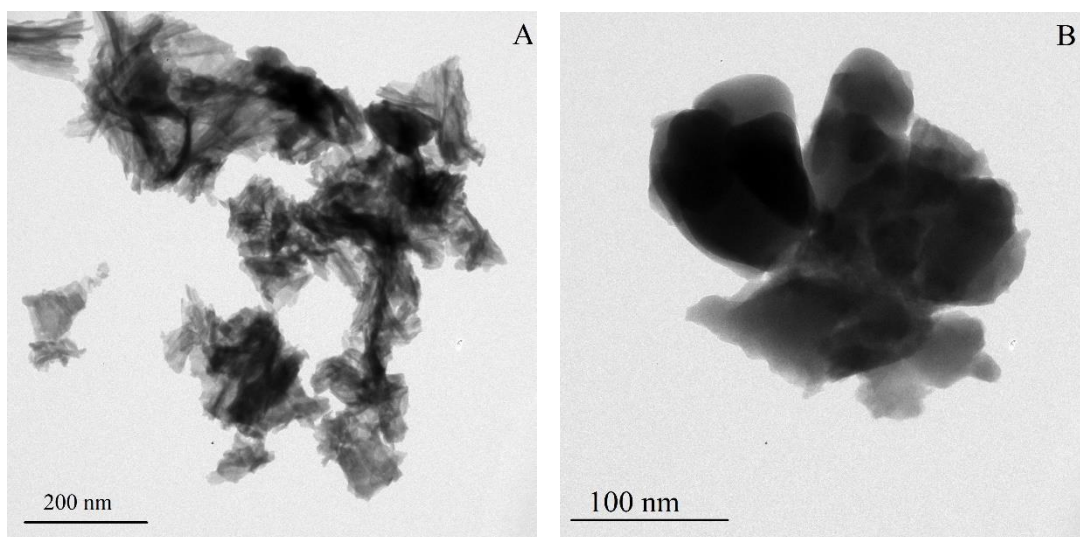

**Fig. S2** TEM images: as-prepared AgBi-HM sample (A), AgBi-HM sample used in flow scale-out (B).

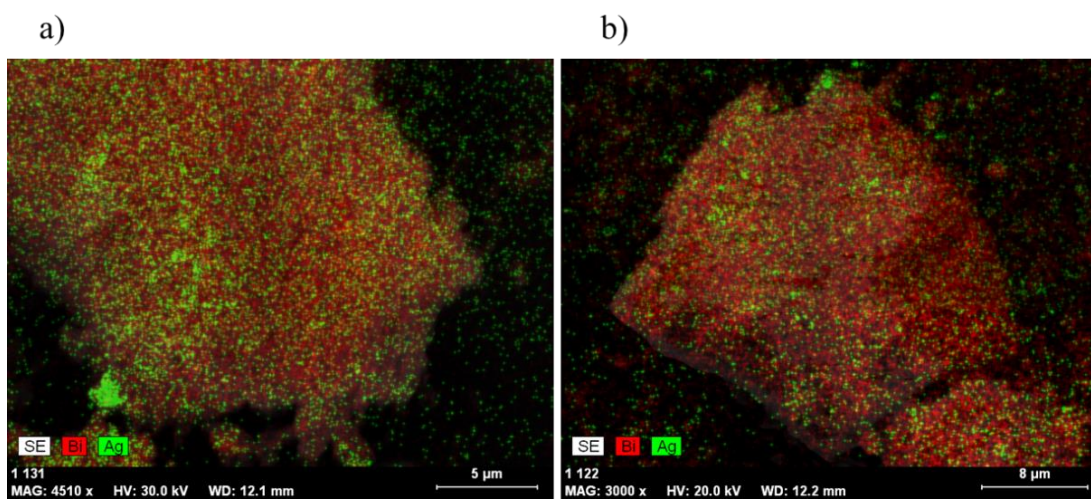

**Fig. S3** SEM-EDX results of AgBi-HM catalyst samples used a) in batch process b) in flow scale-out process.

## 2. Analytical Data of the Reaction Products

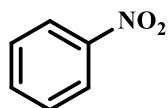

nitrobenzene

$^1\text{H}$  NMR (500 MHz,  $\text{CDCl}_3$ ):  $\delta$ = 8.22-8.21 (d,  $J$ = 8.38 Hz, 2H), 7.72- 7.69 (t,  $J$ =7.38 Hz, 1H), 7.56-7.53 (t,  $J$ = 8.38 Hz, 2H);  $^{13}\text{C}$  NMR (125 MHz,  $\text{CDCl}_3$ ): 148.2, 134.3, 129.3, 123.4. NMR data is in agreement with the published data.<sup>1</sup> MS (EI)  $m/z$  = 51, 65, 77, 93, 123

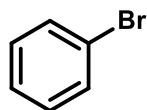

bromobenzene

$^1\text{H}$  NMR (500 MHz,  $\text{CDCl}_3$ ):  $\delta$ = 7.87-7.85 (dd,  $J$ = 7.63 Hz, 1H), 7.68-7.66 (dd,  $J$ = 7.63 Hz, 1H), 7.39-7.31 (m, 3H);  $^{13}\text{C}$  NMR (125 MHz,  $\text{CDCl}_3$ ): 134.5, 132.7, 131.4, 127.1. NMR data is in agreement with the published data.<sup>2</sup> MS (EI)  $m/z$  = 51, 63, 77, 84, 100, 157

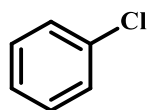

chlorobenzene

$^1\text{H}$  NMR (500 MHz,  $\text{CDCl}_3$ ):  $\delta$ = 7.48-7.33 (m, 3+2H);  $^{13}\text{C}$  NMR (125 MHz,  $\text{CDCl}_3$ ): 132.8, 131.6, 131.2, 126.6. NMR data is in agreement with the published data.<sup>2</sup> MS (EI)  $m/z$  = 51, 61, 77, 113

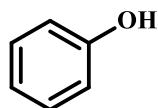

phenol

$^1\text{H}$  NMR (500 MHz,  $\text{CDCl}_3$ ):  $\delta$ = 7.24-7.21 (t,  $J$ = 7.27 Hz, 2H), 6.91-6.83 (m, 3H);  $^{13}\text{C}$  NMR (125 MHz,  $\text{CDCl}_3$ ): 155.4, 129.6, 120.7, 115.3. NMR data is in agreement with the published data.<sup>3</sup> MS (EI)  $m/z$  = 51, 65, 78, 94

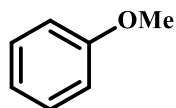

anisole

$^1\text{H}$  NMR (500 MHz,  $\text{CDCl}_3$ ):  $\delta$ = 7.80-7.78 (m, 1H), 7.48-7.43 (m, 1H), 6.99-6.96 (m, 3H), 3.88 (s, 3H);  $^{13}\text{C}$  NMR (125 MHz,  $\text{CDCl}_3$ ): 159.1, 131.6, 120.1, 112.4, 55.9. NMR data is in agreement with the published data.<sup>4</sup> MS (EI)  $m/z$  = 51, 65, 78, 93, 108

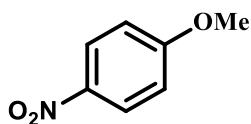

4-nitroanisole

$^1\text{H}$  NMR (500 MHz,  $\text{CDCl}_3$ ):  $\delta$ = 8.22-8.19 (d,  $J$ = 9.24 Hz, 2H), 6.98-6.94 (d,  $J$ = 9.24 Hz, 2H), 3.91 (s, 3H);  $^{13}\text{C}$  NMR (125 MHz,  $\text{CDCl}_3$ ): 164.6, 141.6, 125.9, 114.0, 56.2. NMR data is in agreement with the published data.<sup>5</sup> MS (EI)  $m/z$  = 63, 77, 92, 95, 107, 123, 137, 153

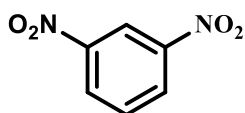

1,3-dinitrobenzene

$^1\text{H}$  NMR (500 MHz,  $\text{CDCl}_3$ ):  $\delta$ = 9.10-9.07 (m, 1H), 8.59-8.57 (m, 2H), 7.83-7.79 (t,  $J$ =8.45 Hz, 1H);  $^{13}\text{C}$  NMR (125 MHz,  $\text{CDCl}_3$ ): 148.6, 130.7, 128.8, 119.0. NMR data is in agreement with the published data.<sup>6</sup> MS (EI)  $m/z$  = 51, 64, 75, 83, 85, 92, 122, 168

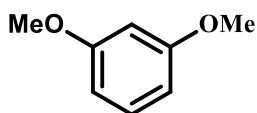

1,3-dimethoxybenzene

$^1\text{H}$  NMR (500 MHz,  $\text{CDCl}_3$ ):  $\delta$ = 7.29-7.26 (t,  $J$ =8.47 Hz 1H), 6.56-6.54 (d,  $J$ =8.47 Hz, 2 H), 6.52-6.51 (m, 1H), 3.79 (s, 6H);  $^{13}\text{C}$  NMR (125 MHz,  $\text{CDCl}_3$ ): 157.4, 131.0, 104.1, 100.2, 56.0. NMR data is in agreement with the published data.<sup>2</sup> MS (EI)  $m/z$  = 51, 52, 65, 78, 95, 109, 138

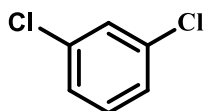

1,3-dichlorobenzene

$^1\text{H}$  NMR (500 MHz,  $\text{CDCl}_3$ ):  $\delta$ = 7.44-7.42 (m, 1H), 7.32-7.30 (m, 3H);  $^{13}\text{C}$  NMR (125 MHz,  $\text{CDCl}_3$ ): 132.6, 131.1, 128.8, 127.0. NMR data is in agreement with the published data.<sup>7</sup> MS (EI)  $m/z$  = 55, 75, 83, 111, 145, 148

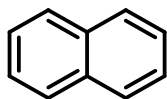

naphthalene

$^1\text{H}$  NMR (500 MHz,  $\text{CDCl}_3$ ):  $\delta$ = 8.04-8.03 (d,  $J$ = 8.12 Hz, 4H), 7.63-7.62 (d,  $J$ =8.12 Hz, 4H);  $^{13}\text{C}$  NMR (125 MHz,  $\text{CDCl}_3$ ): 133.7, 128.5, 126.2. NMR data is in agreement with the published data.<sup>7</sup> MS (EI)  $m/z$  = 51, 63, 83, 102, 127, 128

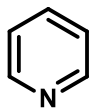

pyridine

$^1\text{H}$  NMR (500 MHz,  $\text{CDCl}_3$ ):  $\delta$ = 8.61-8.59 (m, 2H); 7.66-7.62 (m, 1H); 7.35-7.24 (m, 2H);  
 $^{13}\text{C}$  NMR (125 MHz,  $\text{CDCl}_3$ ): 149.8, 135.8, 123.7. NMR data is in agreement with the  
published data.<sup>6</sup> MS (EI)  $m/z$  = 51, 52, 64, 78, 79

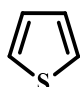

thiophene

$^1\text{H}$  NMR (500 MHz,  $\text{CDCl}_3$ ):  $\delta$ = 7.34-7.33 (m, 2H), 7.12-7.11 (m, 2H);  $^{13}\text{C}$  NMR (125 MHz,  
 $\text{CDCl}_3$ ): 126.9, 125.2. NMR data is in agreement with the published data.<sup>4</sup> MS (EI)  $m/z$  = 58,  
84

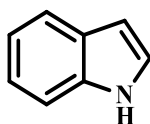

1H-indole

$^1\text{H}$  NMR (500 MHz,  $\text{CDCl}_3$ ):  $\delta$ = 8.56 (s, 1H), 7.64-7.63 (d,  $J$ = 7.83 Hz, 1H) 7.37-7.35 (d,  $J$ =  
7.83 Hz, 1H), 7.19-7.08 (m, 3H), 6.53-6.52 (m, 1H);  $^{13}\text{C}$  NMR (125 MHz,  $\text{CDCl}_3$ ): 135.9,  
127.9, 124.3, 121.8, 120.6, 119.8, 111.2, 102.3; NMR data is in agreement with the published  
data.<sup>8</sup> MS (EI)  $m/z$  = 117, 116, 90, 89, 64, 63

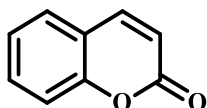

2H-chromen-2-one

$^1\text{H}$  NMR (500 MHz,  $\text{CDCl}_3$ ):  $\delta$ = 7.72-7.70 (d,  $J$ = 9.61 Hz, 1H), 7.55-7.48 (m, 2H), 7.35-7.26  
(m, 2H), 6.44-6.42 (d,  $J$ = 9.61 Hz, 1H);  $^{13}\text{C}$  NMR (125 MHz,  $\text{CDCl}_3$ ): 160.8, 154.1, 143.4,  
131.8, 127.9, 124.4, 118.8, 116.9, 116.8; NMR data is in agreement with the published data.<sup>8</sup>  
MS (EI)  $m/z$  = 146, 118, 90, 89, 64, 63

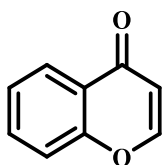

4H-1-benzopyran-4-one

$^1\text{H}$  NMR (500 MHz,  $\text{CDCl}_3$ ):  $\delta$ = 8.22-8.21 (m, 1H), 7.87-7.86 (m, 1H), 7.69-7.68 (m, 1H),  
7.45-7.38 (m, 2H), 6.36-6.35 (m, 1H);  $^{13}\text{C}$  NMR (125 MHz,  $\text{CDCl}_3$ ): 177.7, 155.4, 154.8,  
134.0, 125.8, 125.3, 125.0, 118.2, 113.0; NMR data is in agreement with the published data.<sup>8</sup>  
MS (EI)  $m/z$  = 146, 120, 118, 92, 90, 74, 63

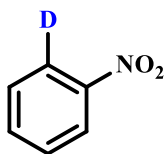

2-nitro-1-deuterobenzene

$^1\text{H}$  NMR (500 MHz, DMSO- $d_6$ ):  $\delta$ = 7.90-7.88 (m, 1H), 7.83-7.82 (m, 1H), 7.76-7.68 (m, 2H);  $^{13}\text{C}$  NMR (125 MHz, DMSO- $d_6$ ): 148.2, 135.6, 130.2, 123.7. NMR data is in agreement with the published data.<sup>9</sup> MS (EI)  $m/z$  = 51, 65, 77, 93, 123

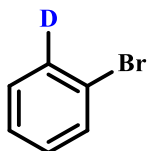

2-bromo-1-deuterobenzene

$^1\text{H}$  NMR (500 MHz, DMSO- $d_6$ ):  $\delta$ = 7.63-7.61 (d,  $J$ = 8.14 Hz, 2H), 7.41-7.38 (t,  $J$ =7.76 Hz, 1H), 7.33-7.30 (m, 1H);  $^{13}\text{C}$  NMR (125 MHz, DMSO- $d_6$ ): 133.6, 131.8, 130.1, 127.9. NMR data is in agreement with the published data.<sup>2</sup> MS (EI)  $m/z$  = 51, 63, 77, 84, 155

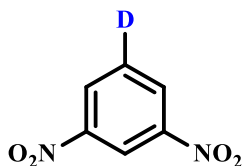

3,5-dinitro-1-deuterobenzene

$^1\text{H}$  NMR (500 MHz, DMSO- $d_6$ ):  $\delta$ = 8.94-8.93 (d,  $J$ = 2.18 Hz, 2H), 8.88-8.87 (t,  $J$ = 2.18 Hz, 1H);  $^{13}\text{C}$  NMR (125 MHz, DMSO- $d_6$ ): 148.2, 140.6, 128.9, 120.2. NMR data is in agreement with the published data.<sup>2</sup> MS (EI)  $m/z$  = 51, 64, 75, 83, 92, 122, 168

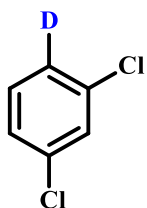

2,4-dichloro-1-deuterobenzene

$^1\text{H}$  NMR (500 MHz, DMSO- $d_6$ ):  $\delta$ = 7.66-7.64 (d,  $J$ = 8.17 Hz, 1H), 7.56-7.52 (m, 1H), 7.42-7.40 (d,  $J$ = 8.17 Hz, 1H);  $^{13}\text{C}$  NMR (125 MHz, DMSO- $d_6$ ): 135.2, 131.4, 129.8, 127.4. NMR data is in agreement with the published data.<sup>2</sup> MS (EI)  $m/z$  = 55, 75, 83, 111, 145, 148

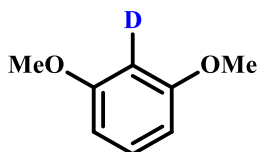



2,6-dimethoxy-1-deuterobenzene

$^1\text{H}$  NMR (500 MHz, DMSO- $d_6$ ):  $\delta$ = 7.32-7.29 (t,  $J$ = 8.37 Hz, 1H), 6.71-6.70 (d,  $J$ = 8.37 Hz, 2H), 3.79 (s, 6H);  $^{13}\text{C}$  NMR (125 MHz, DMSO- $d_6$ ): 156.9, 130.8, 114.8, 104.6, 56.1. NMR data is in agreement with the published data.<sup>9</sup> MS (EI)  $m/z$  = 52, 65, 78, 95, 109, 138

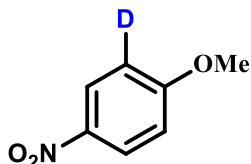

2-methoxy-5-nitro-1-deuterobenzene

$^1\text{H}$  NMR (500 MHz, DMSO- $d_6$ ):  $\delta$ = 7.87-7.86 (d,  $J$ = 8.81 Hz, 1H), 7.05-7.01 (m, 2H), 3.88 (s, 3H);  $^{13}\text{C}$  NMR (125 MHz, DMSO- $d_6$ ): 162.9, 138.1, 126.2, 126.1, 114.3, 113.8, 56.4. NMR data is in agreement with the published data.<sup>10</sup> MS (EI)  $m/z$  = 63, 77, 92, 95, 107, 123, 137, 153

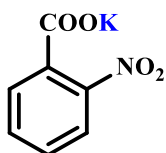

potassium-2-nitrobenzoate

$^1\text{H}$  NMR (500 MHz, DMSO- $d_6$ ):  $\delta$ = 7.69-7.67 (d,  $J$ = 7.99 Hz, 1H), 7.23-7.19 (m, 1H), 6.74-6.72 (d,  $J$ = 7.99 Hz, 1H), 6.51-6.48 (m, 1H). NMR data is in agreement with the published data.<sup>11</sup> MS (EI)  $m/z$  = 57, 77, 86, 91, 105, 115, 145, 161, 177, 205

### 3. Collection of NMR Spectra

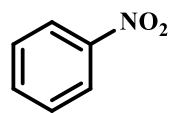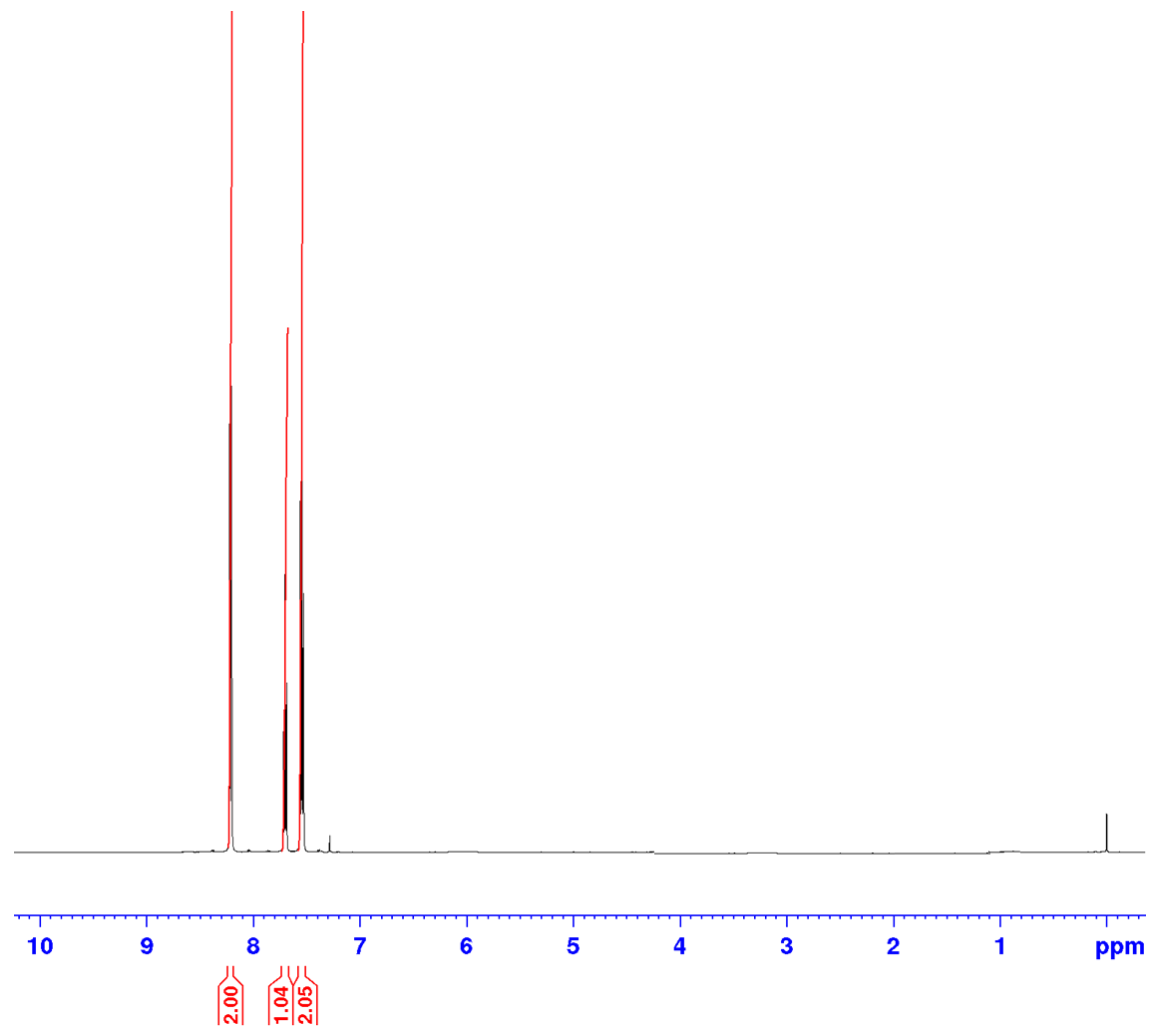

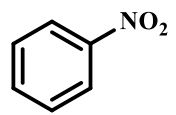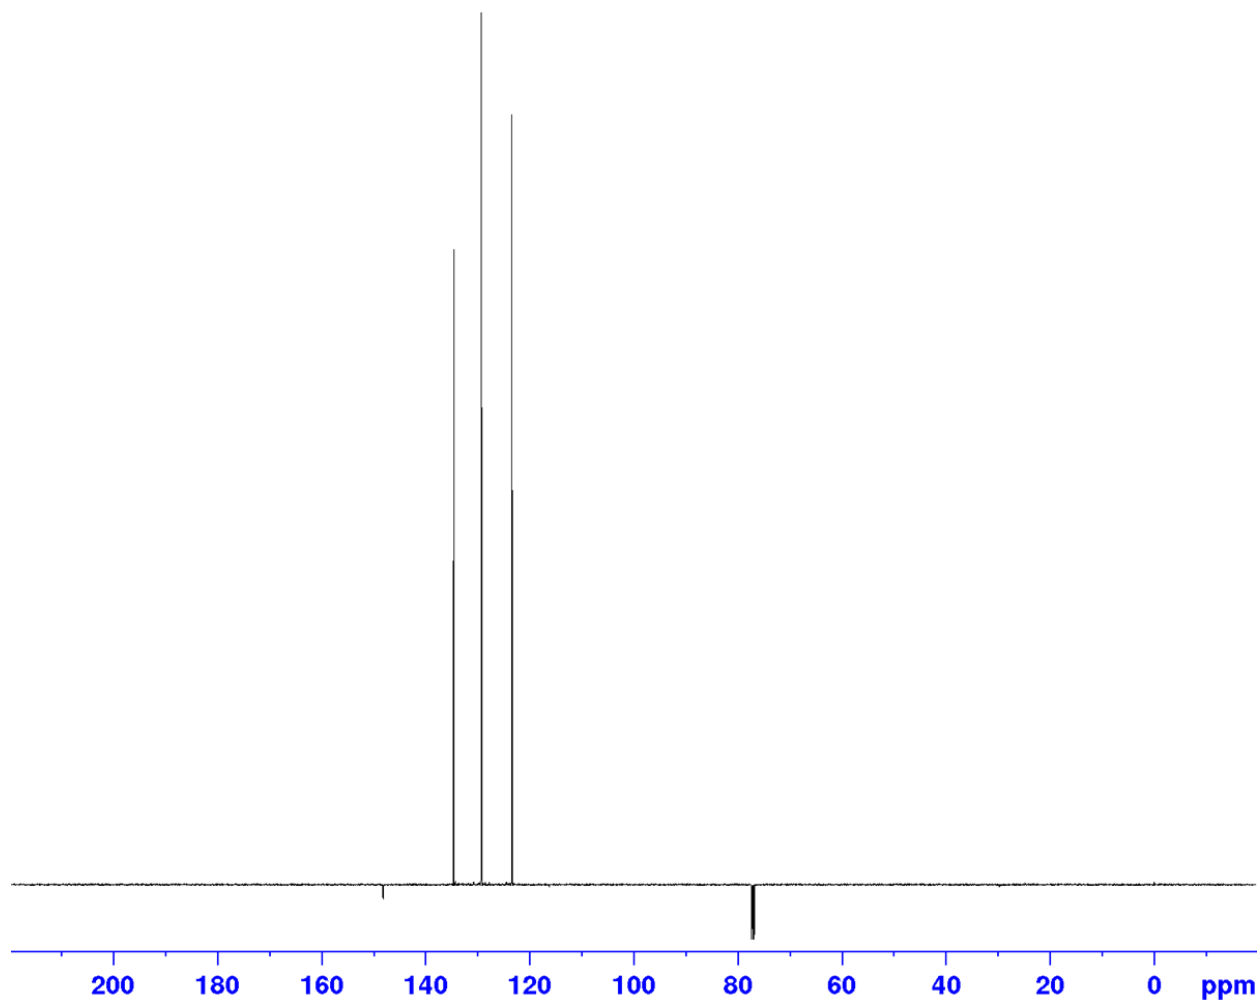

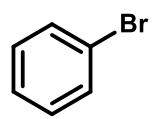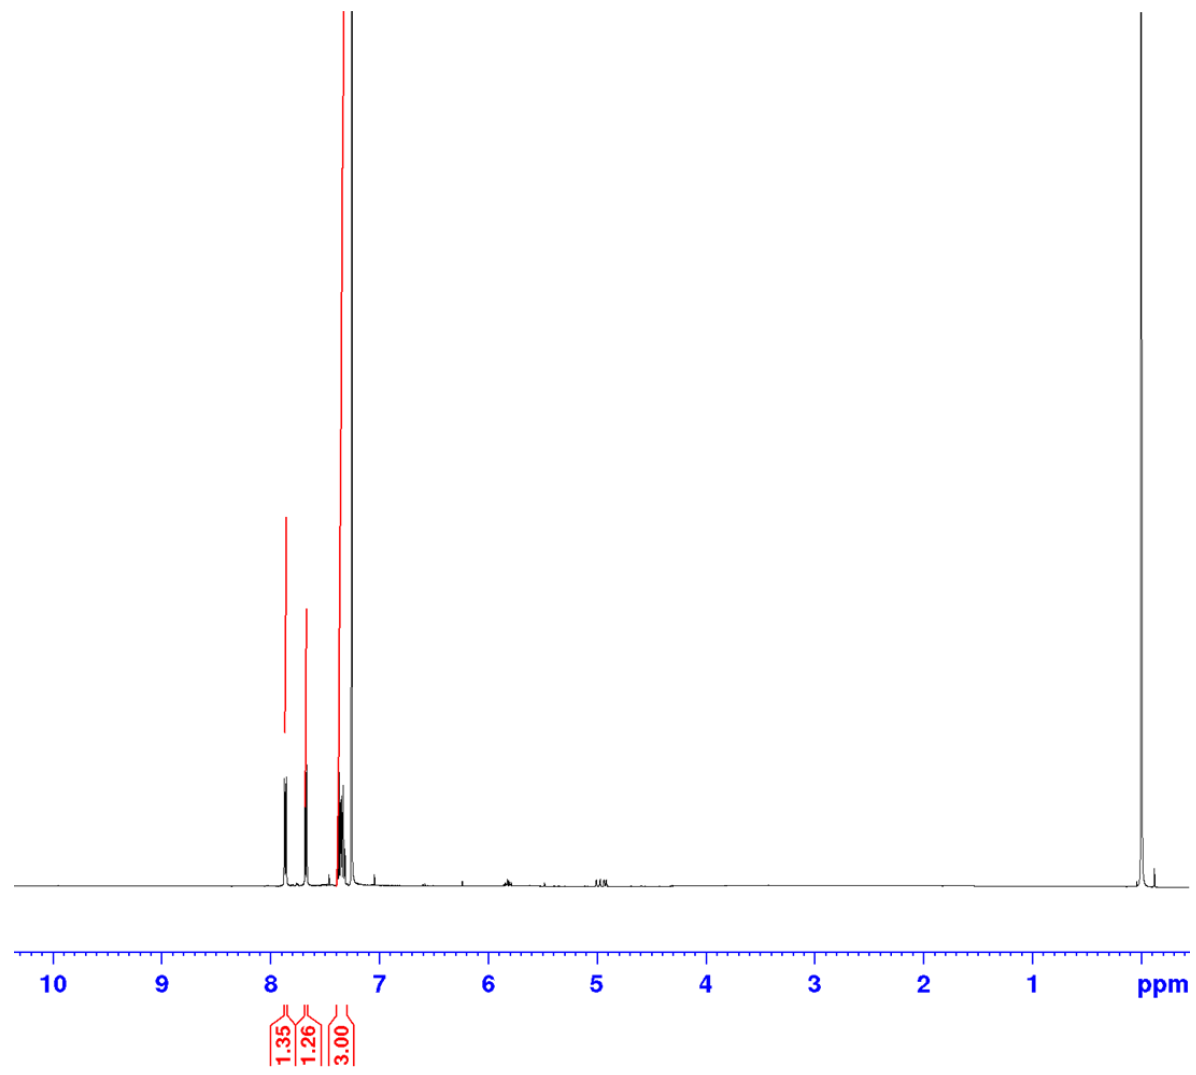

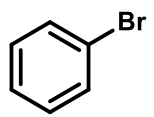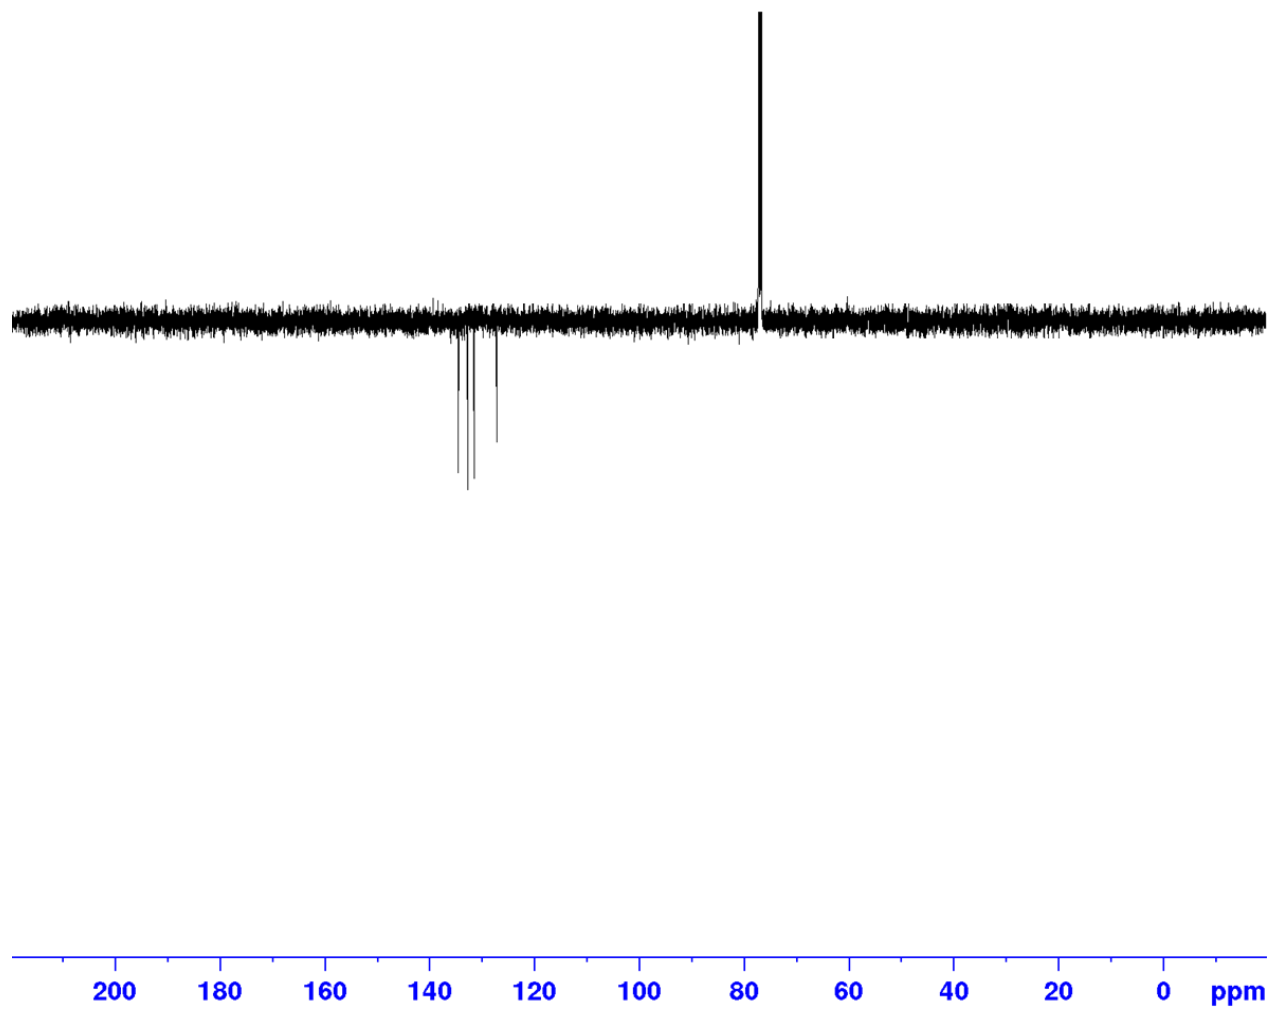

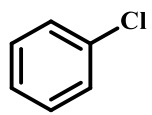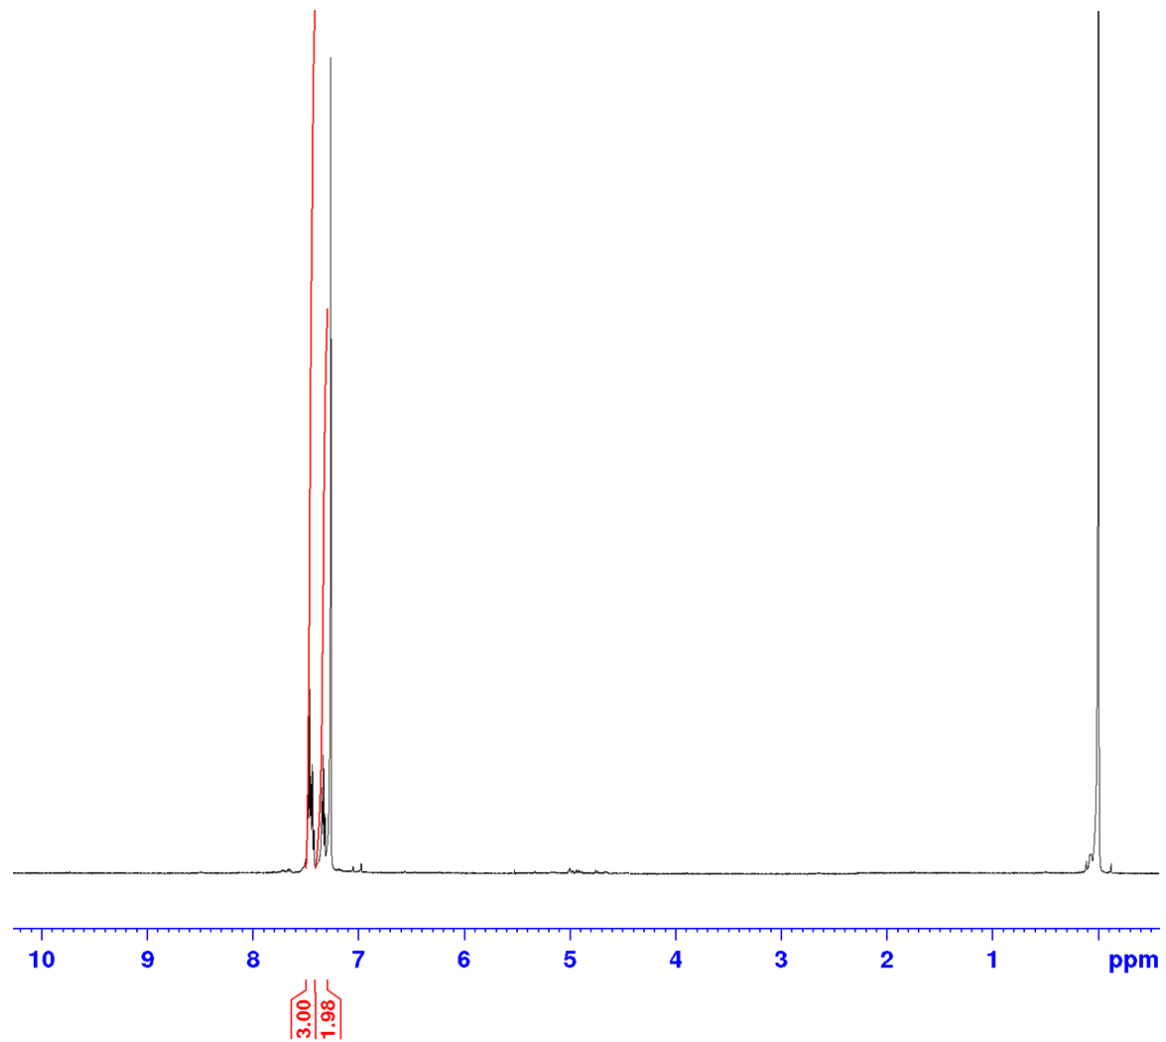

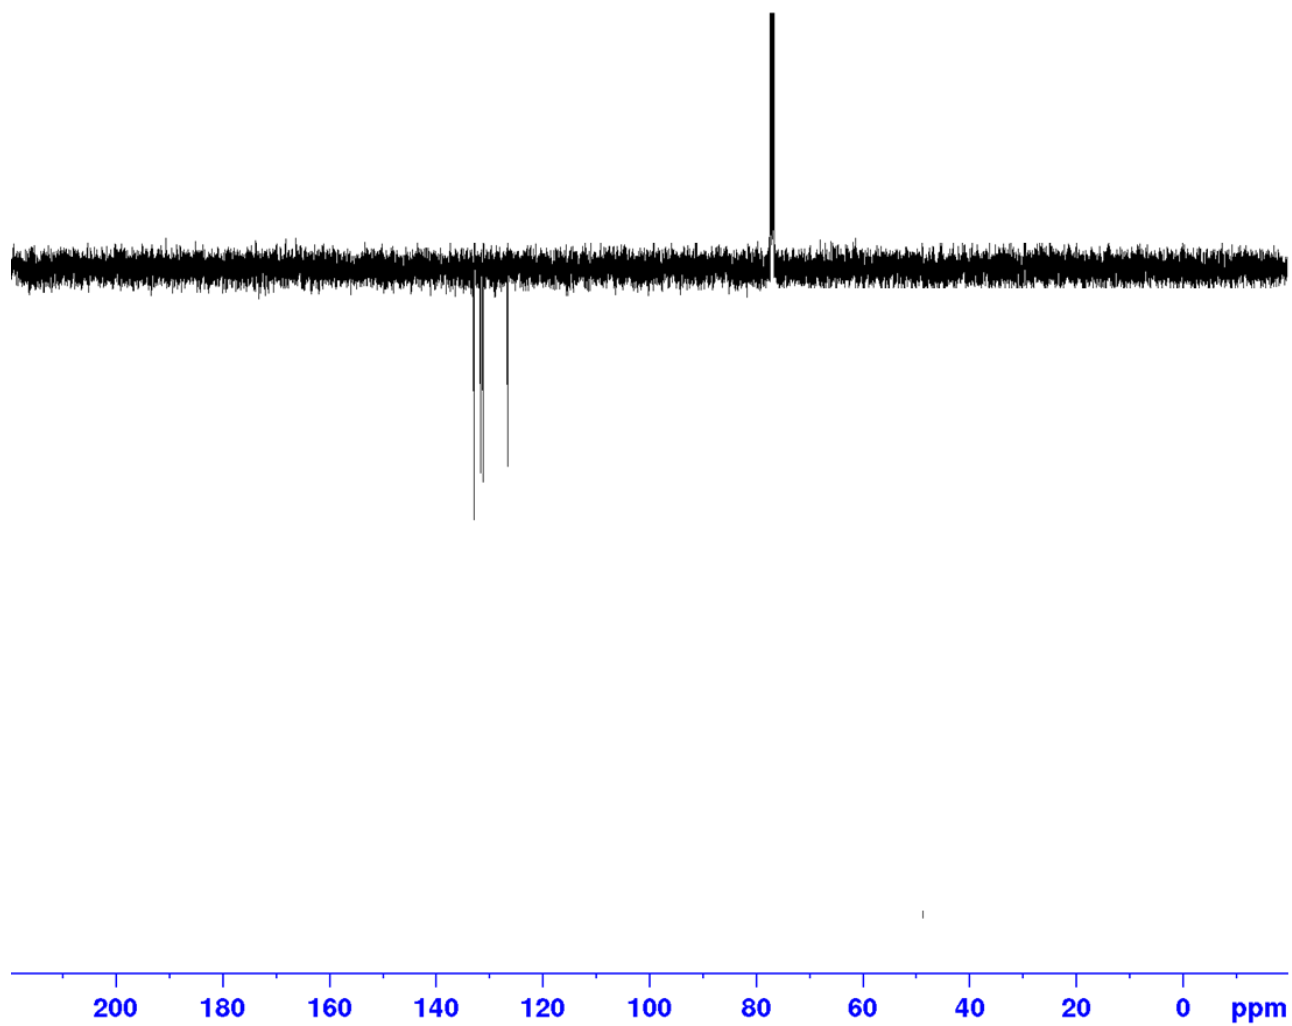

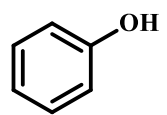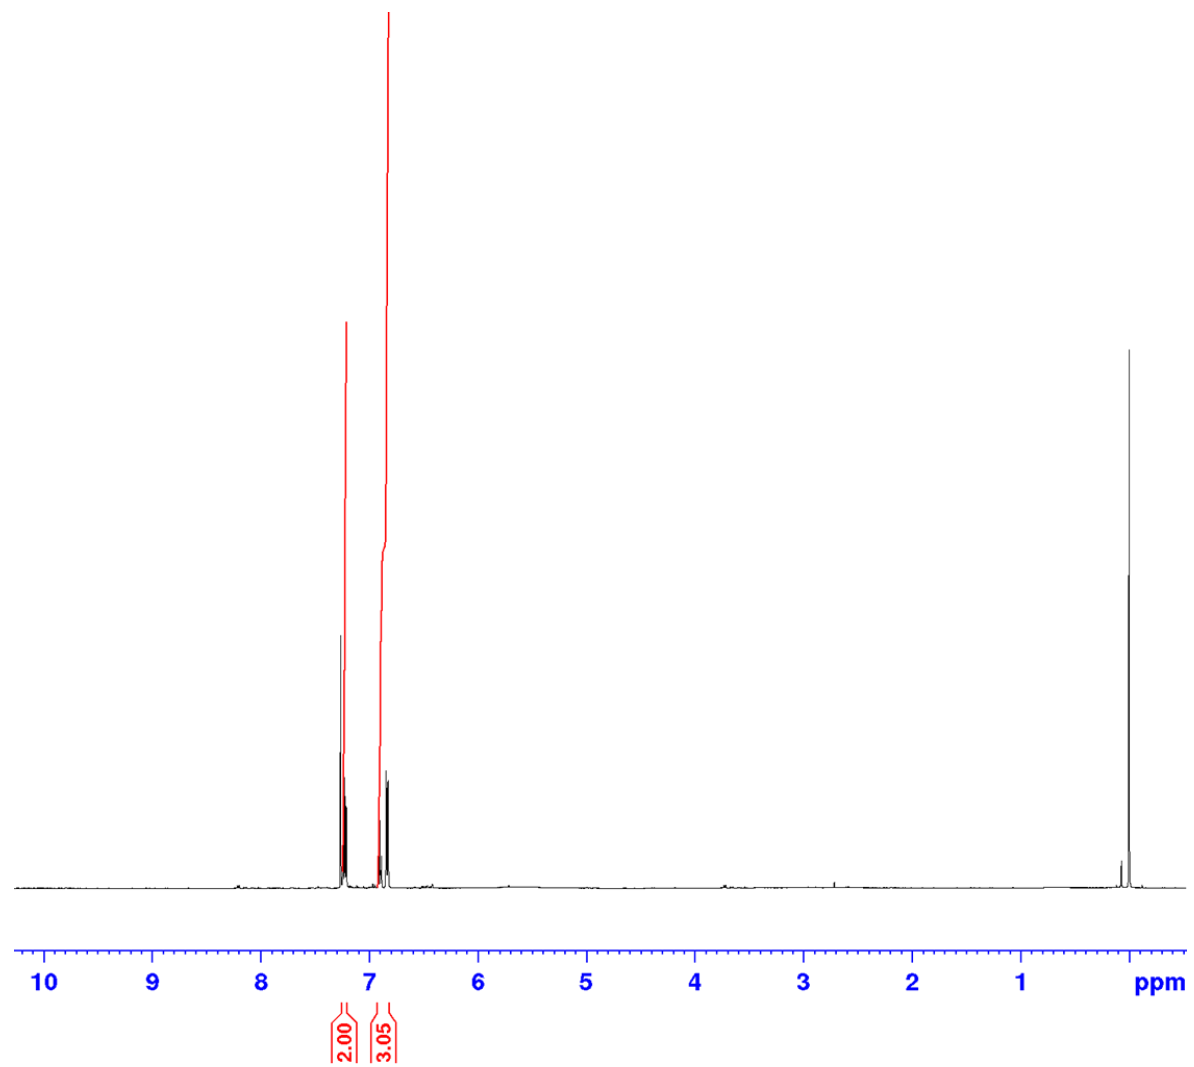



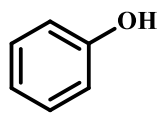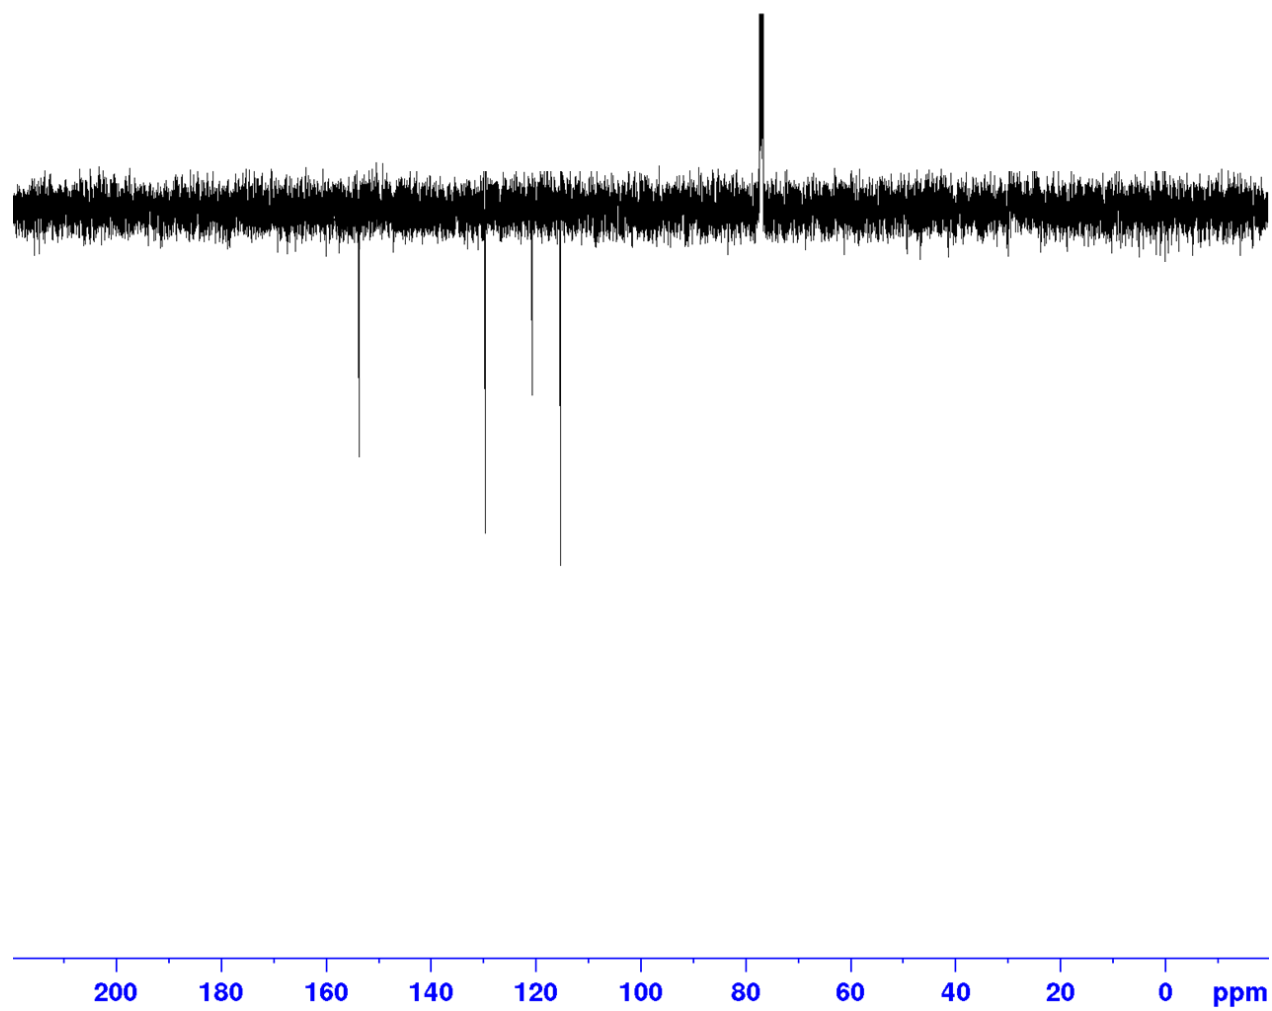

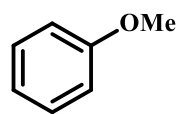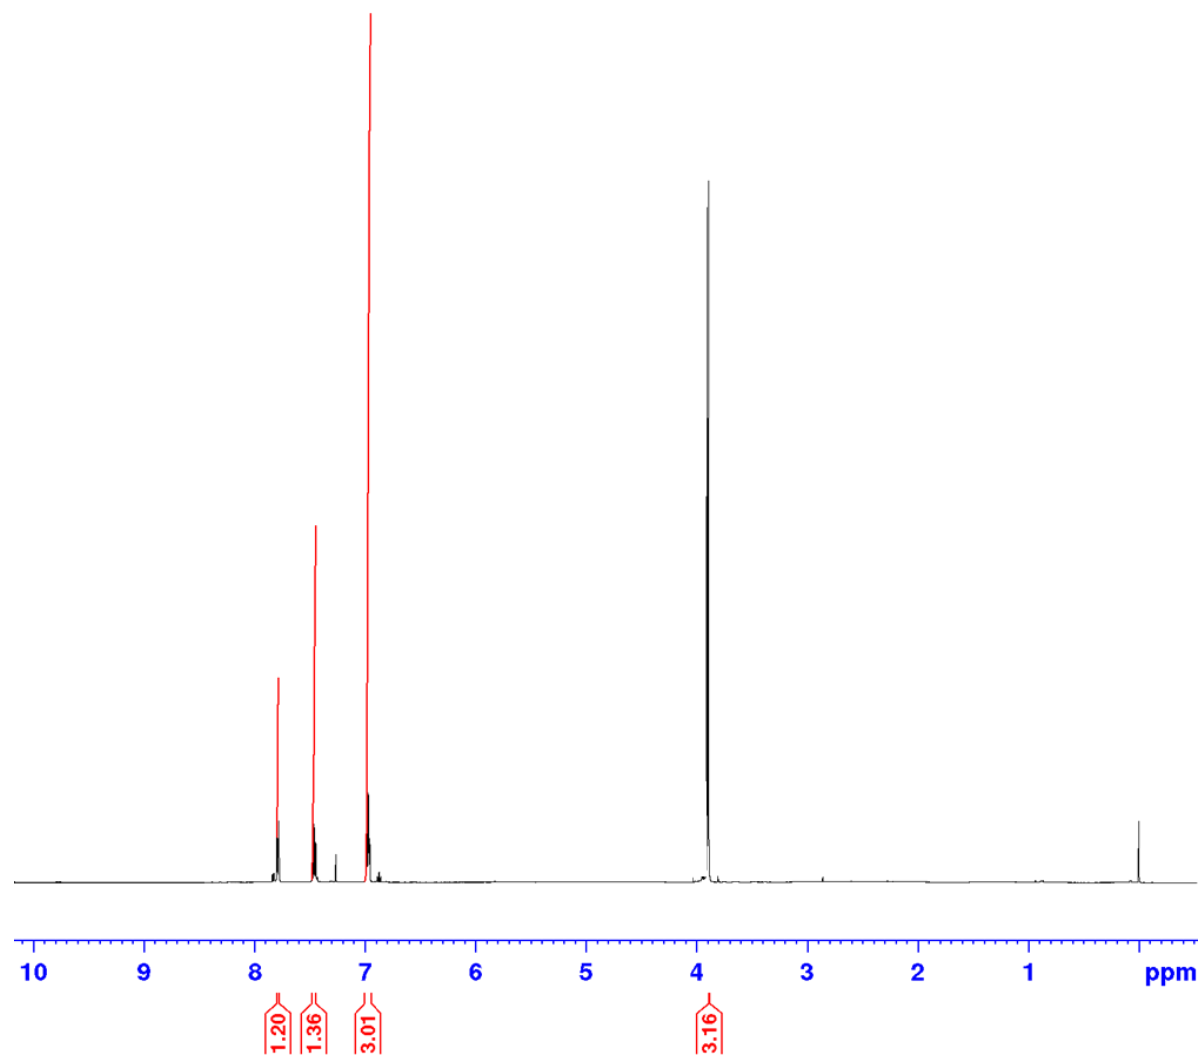

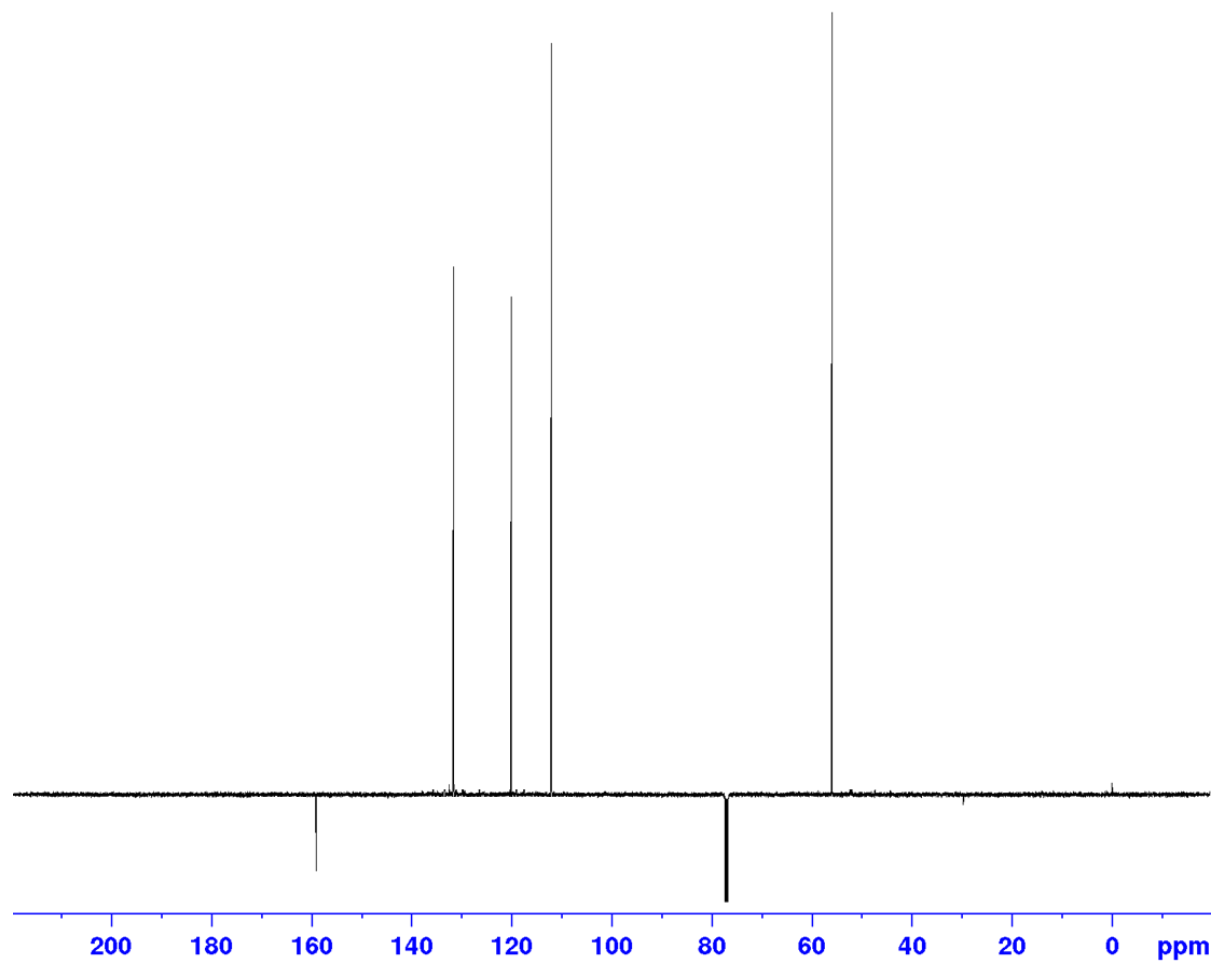

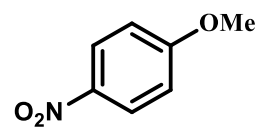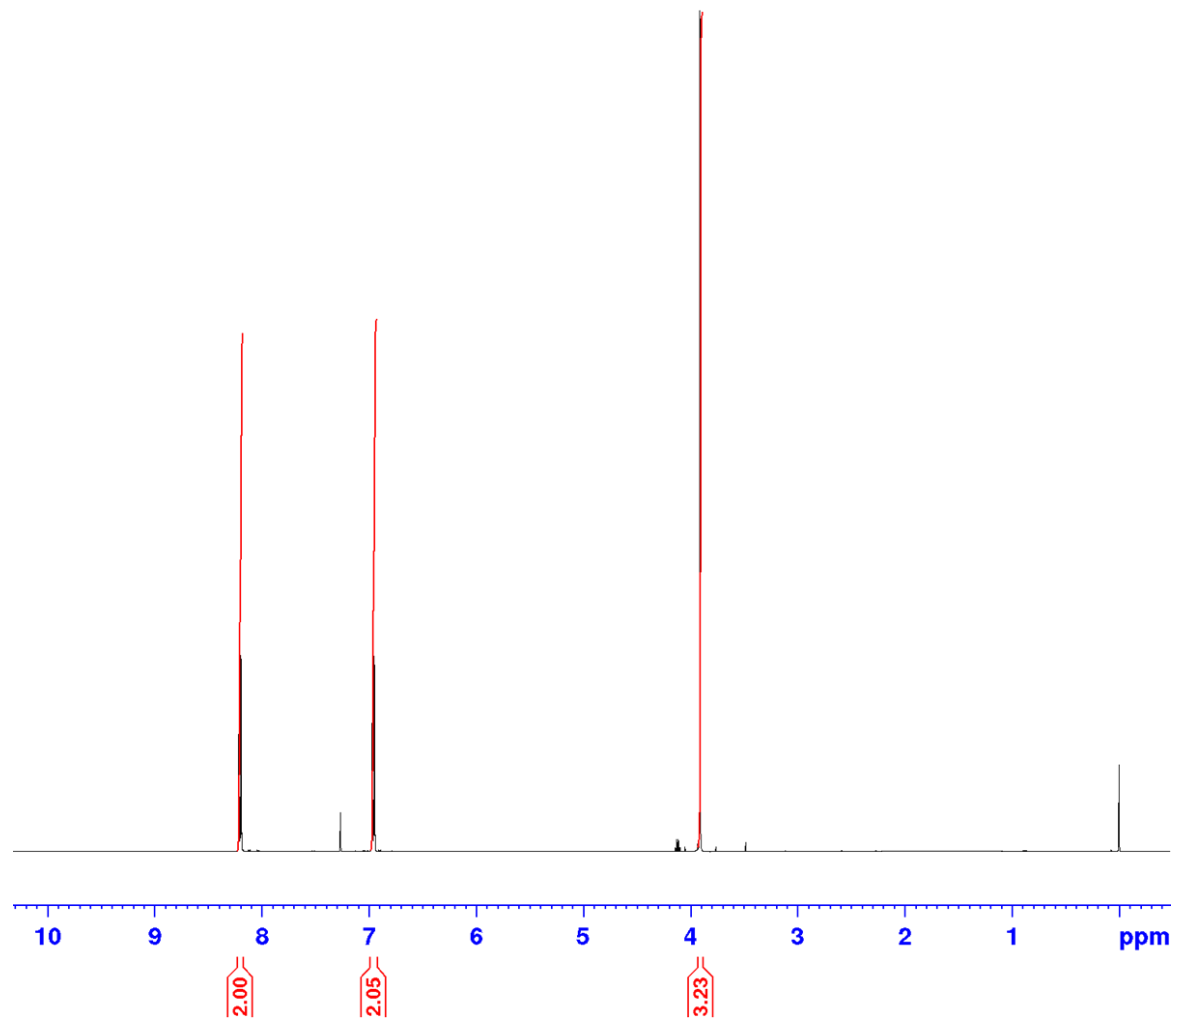

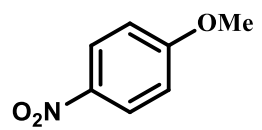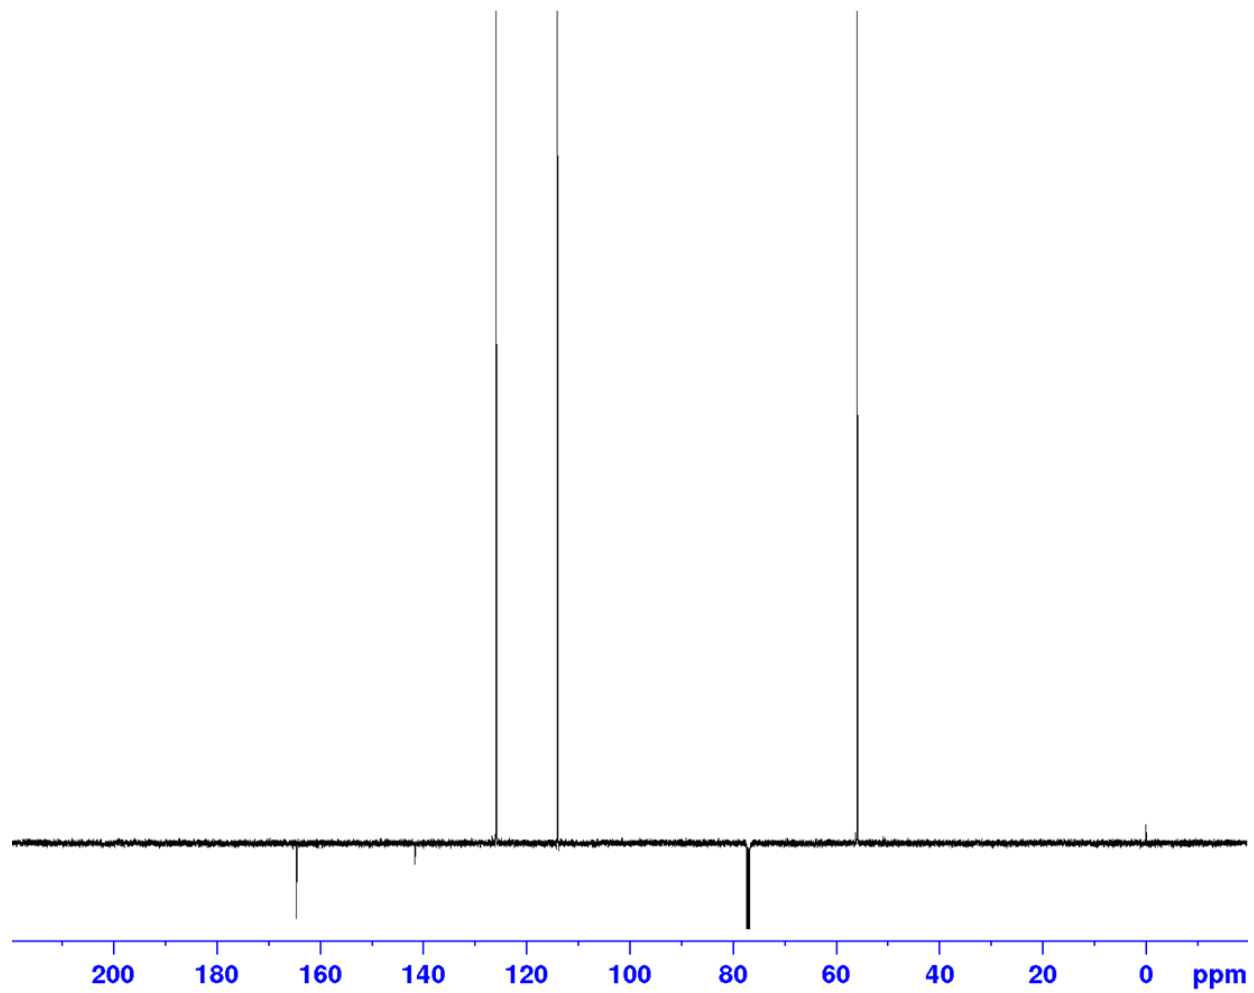

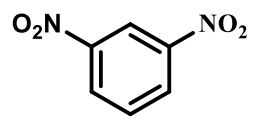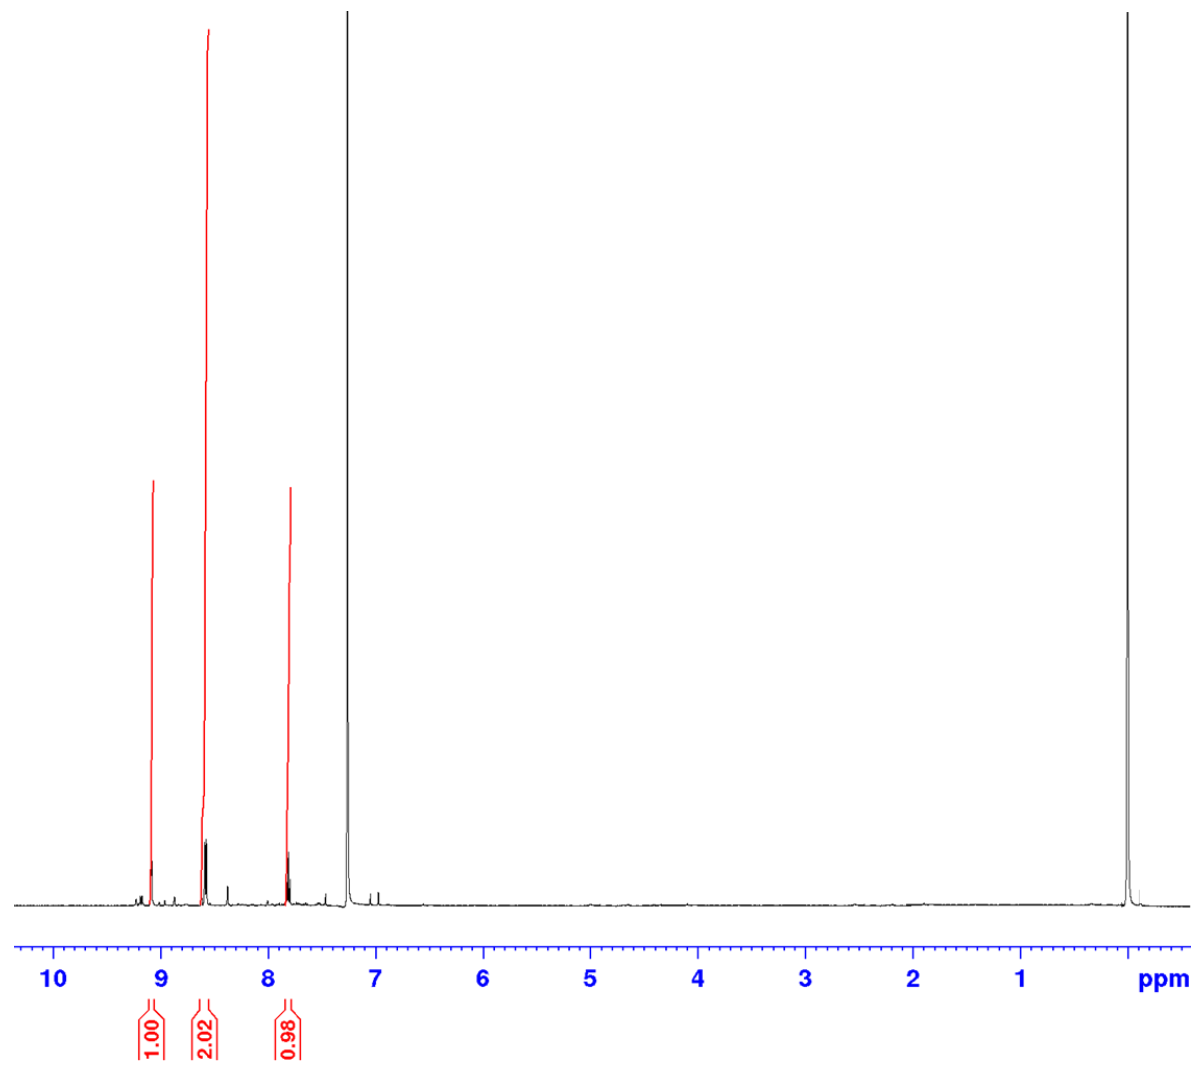

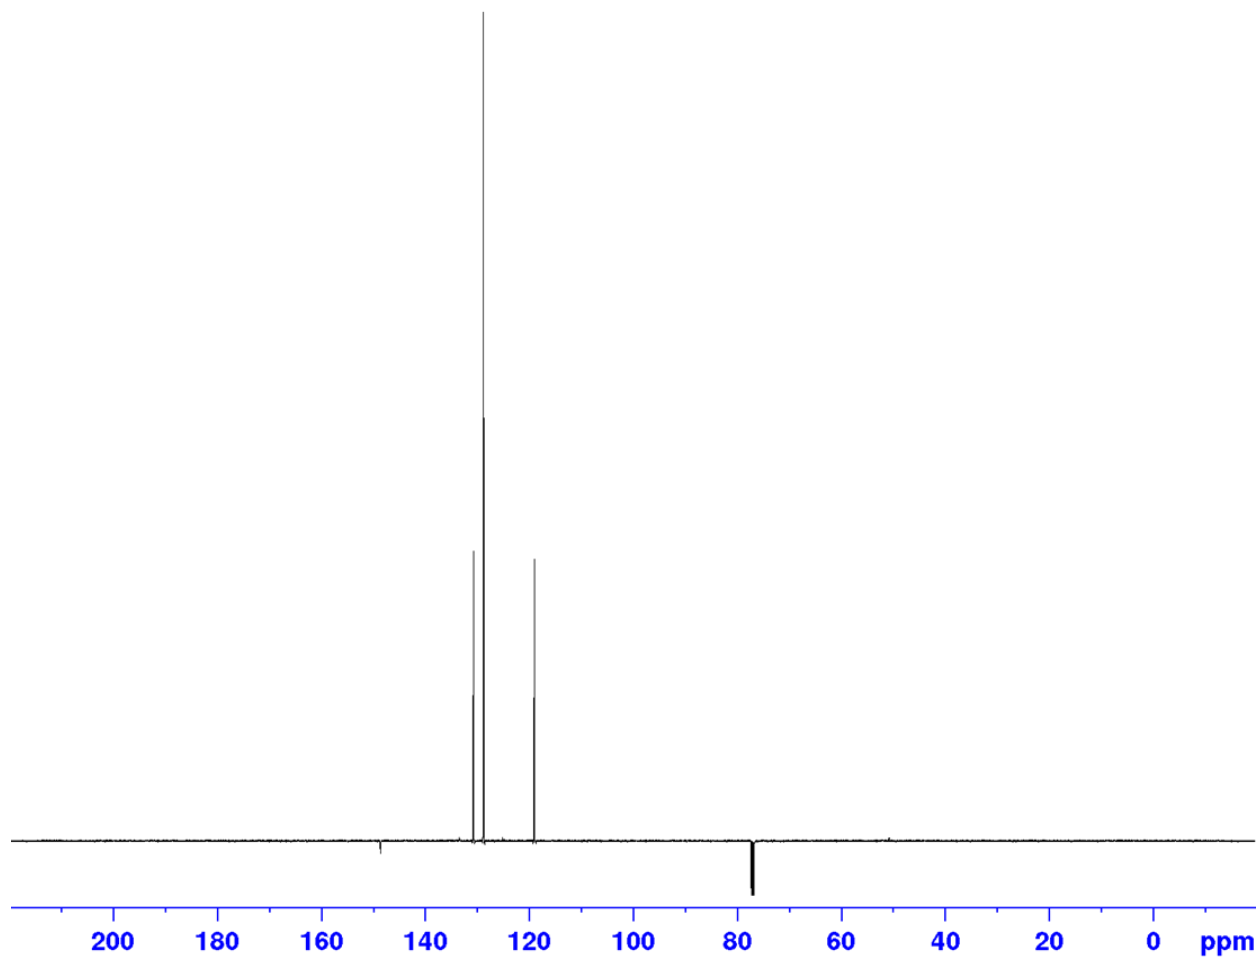

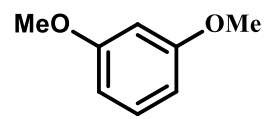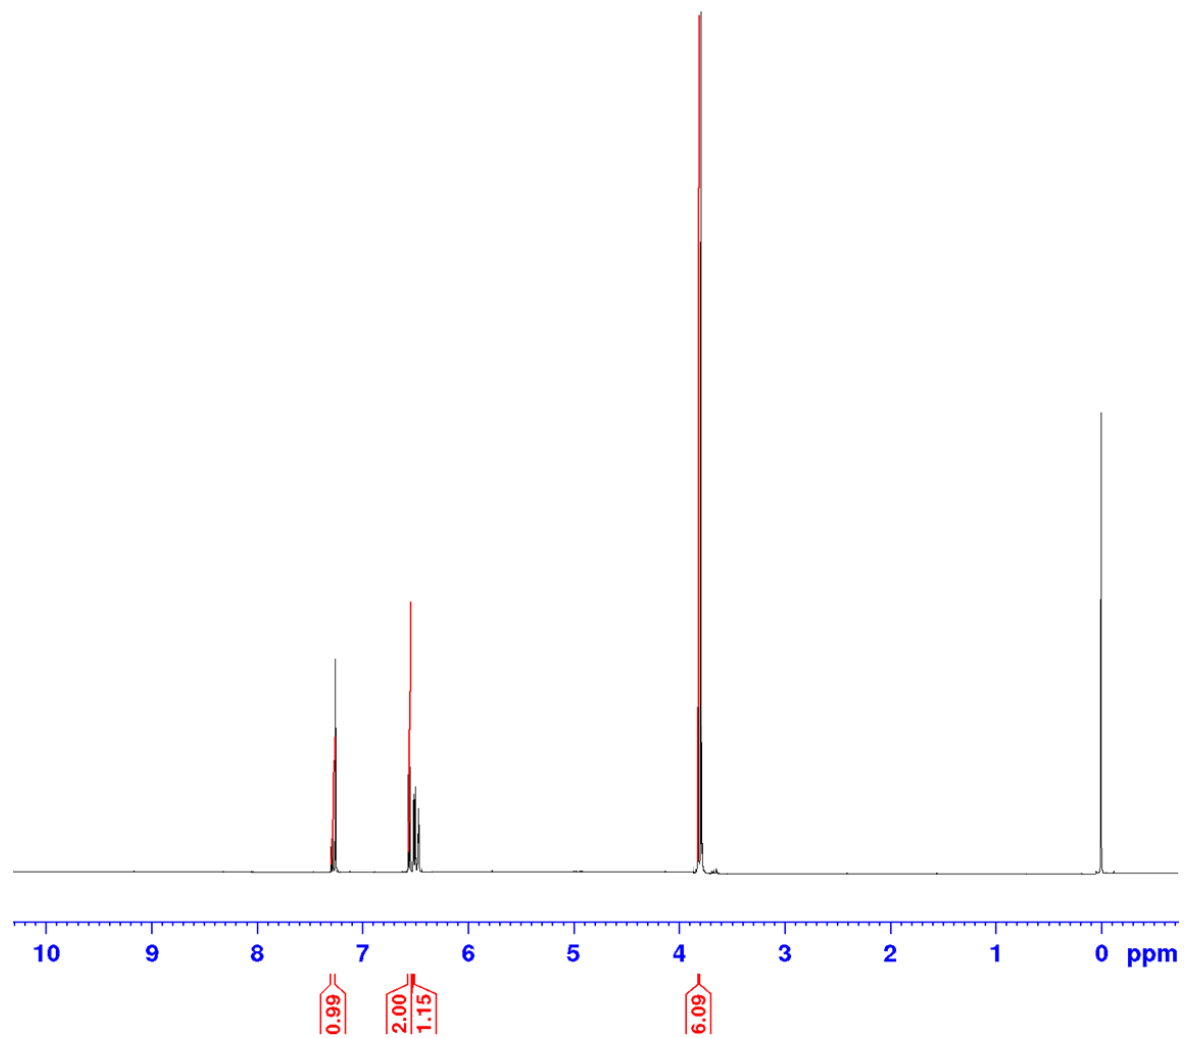



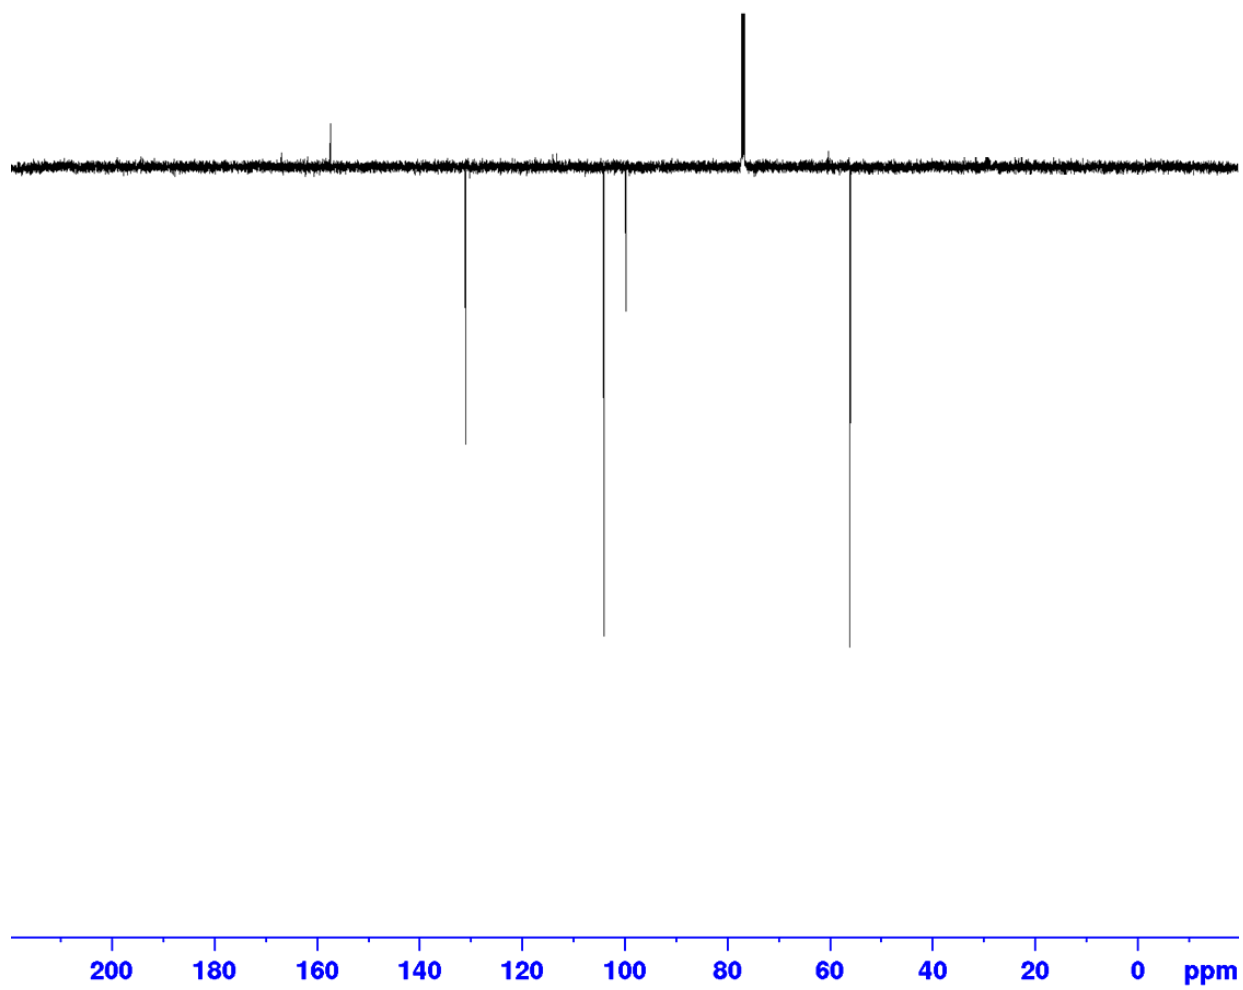

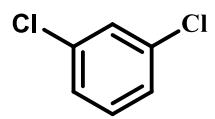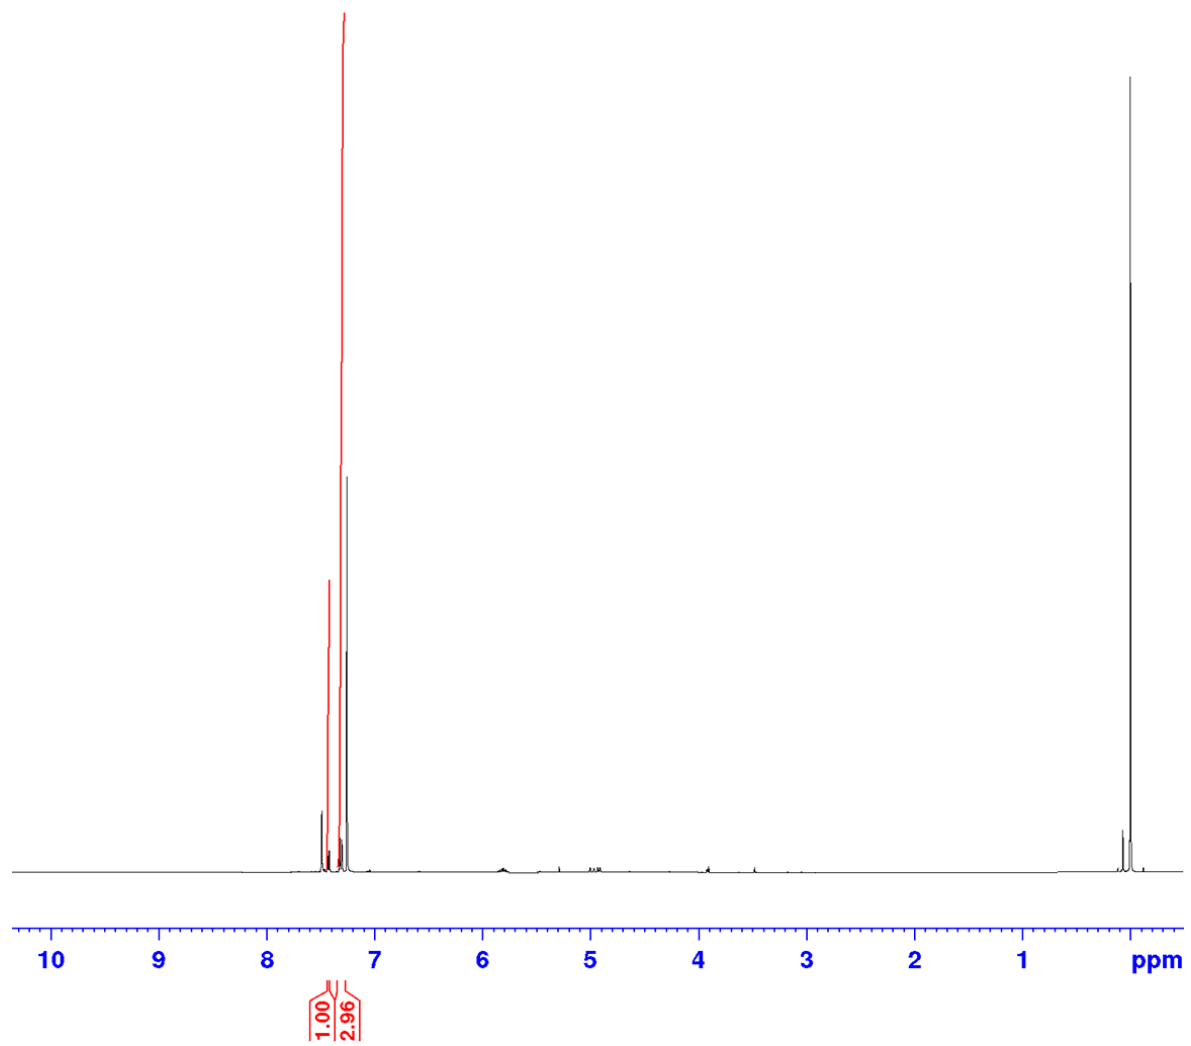

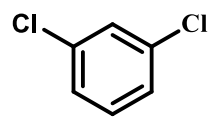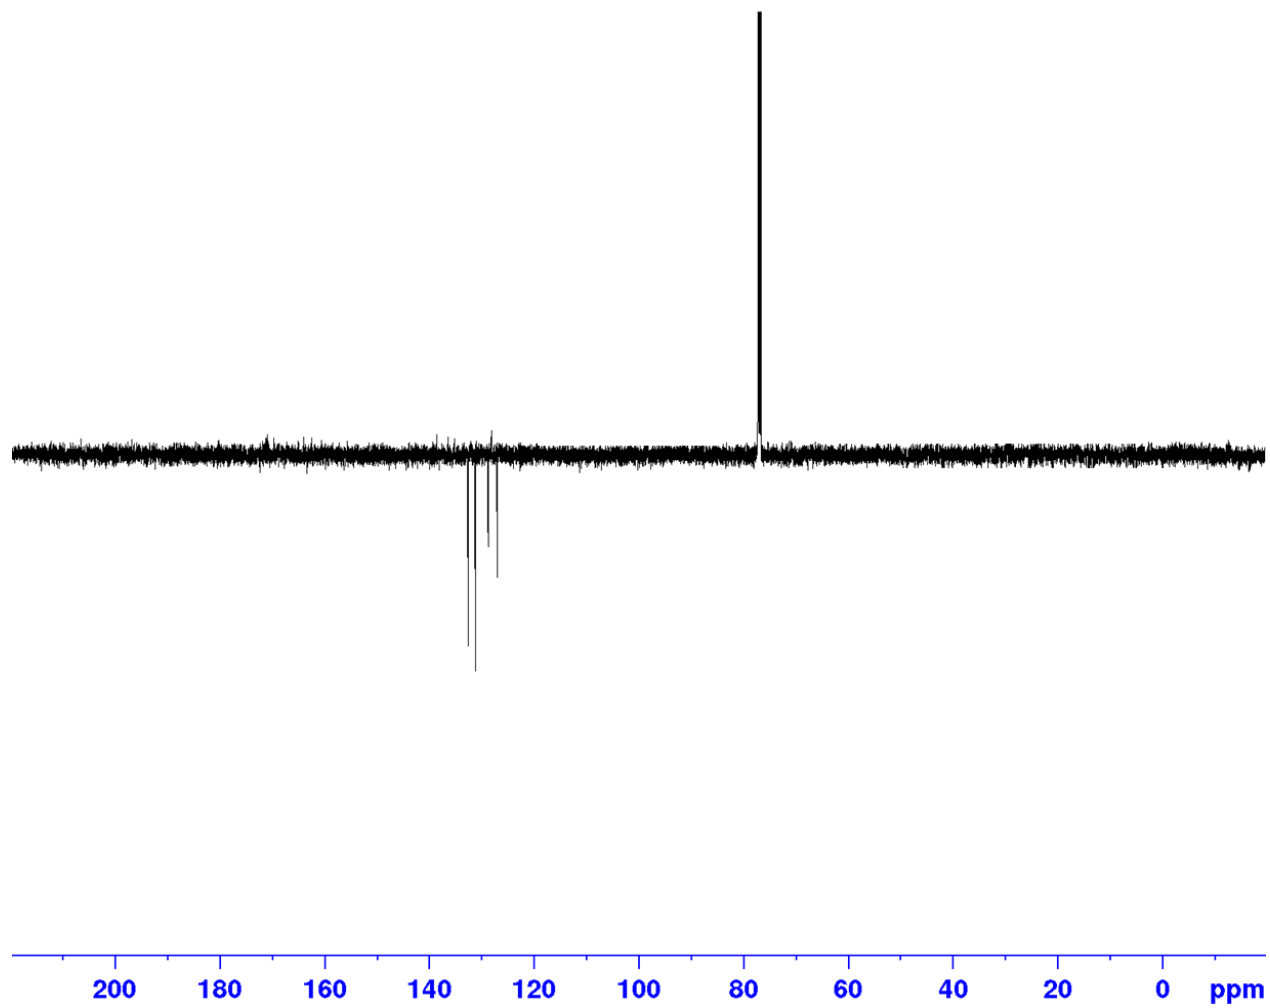

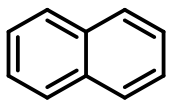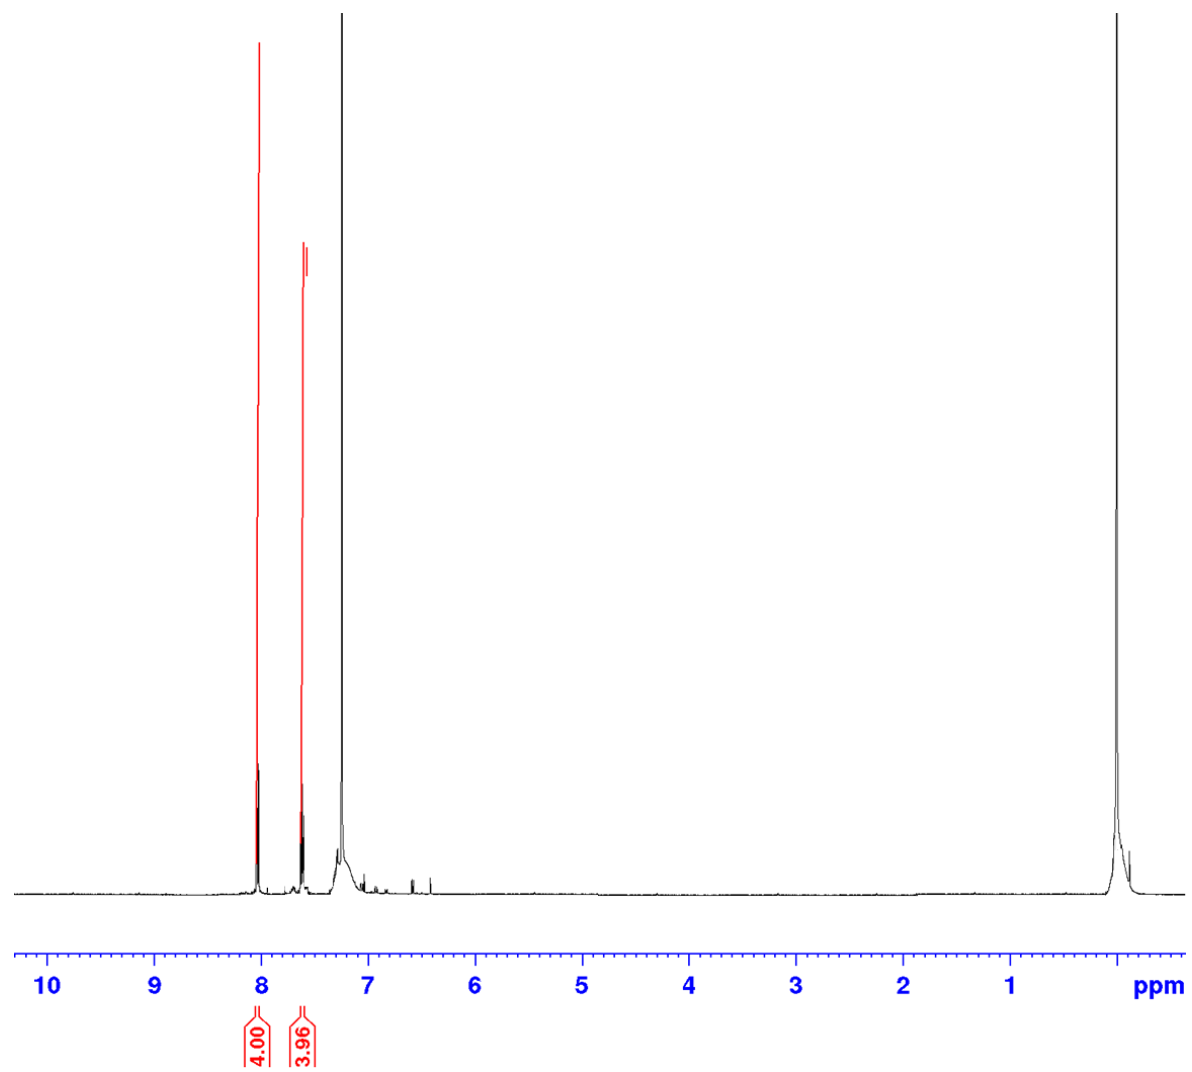

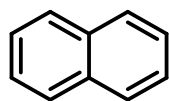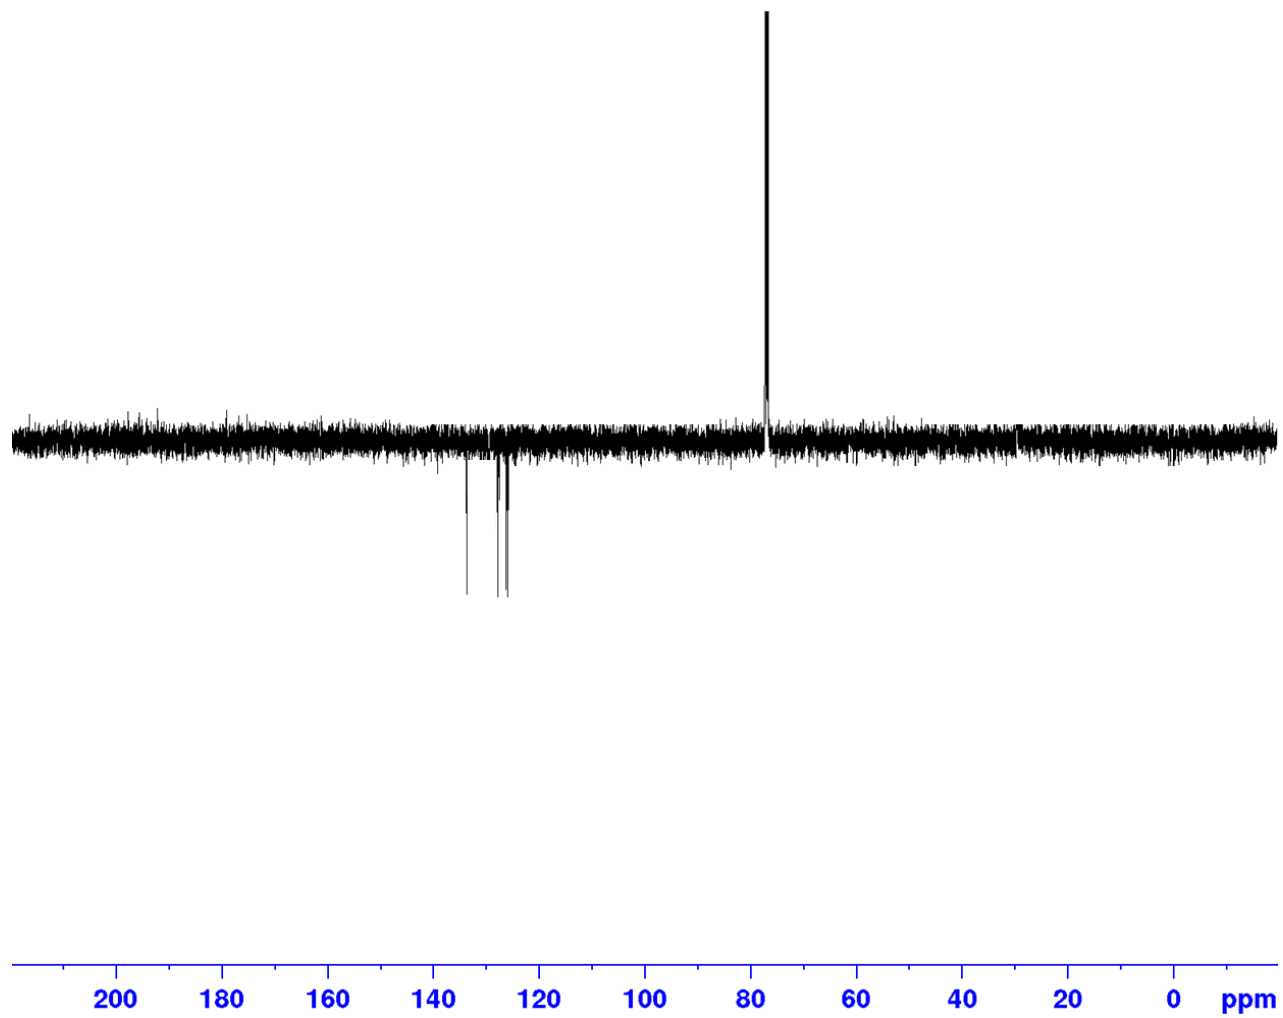

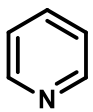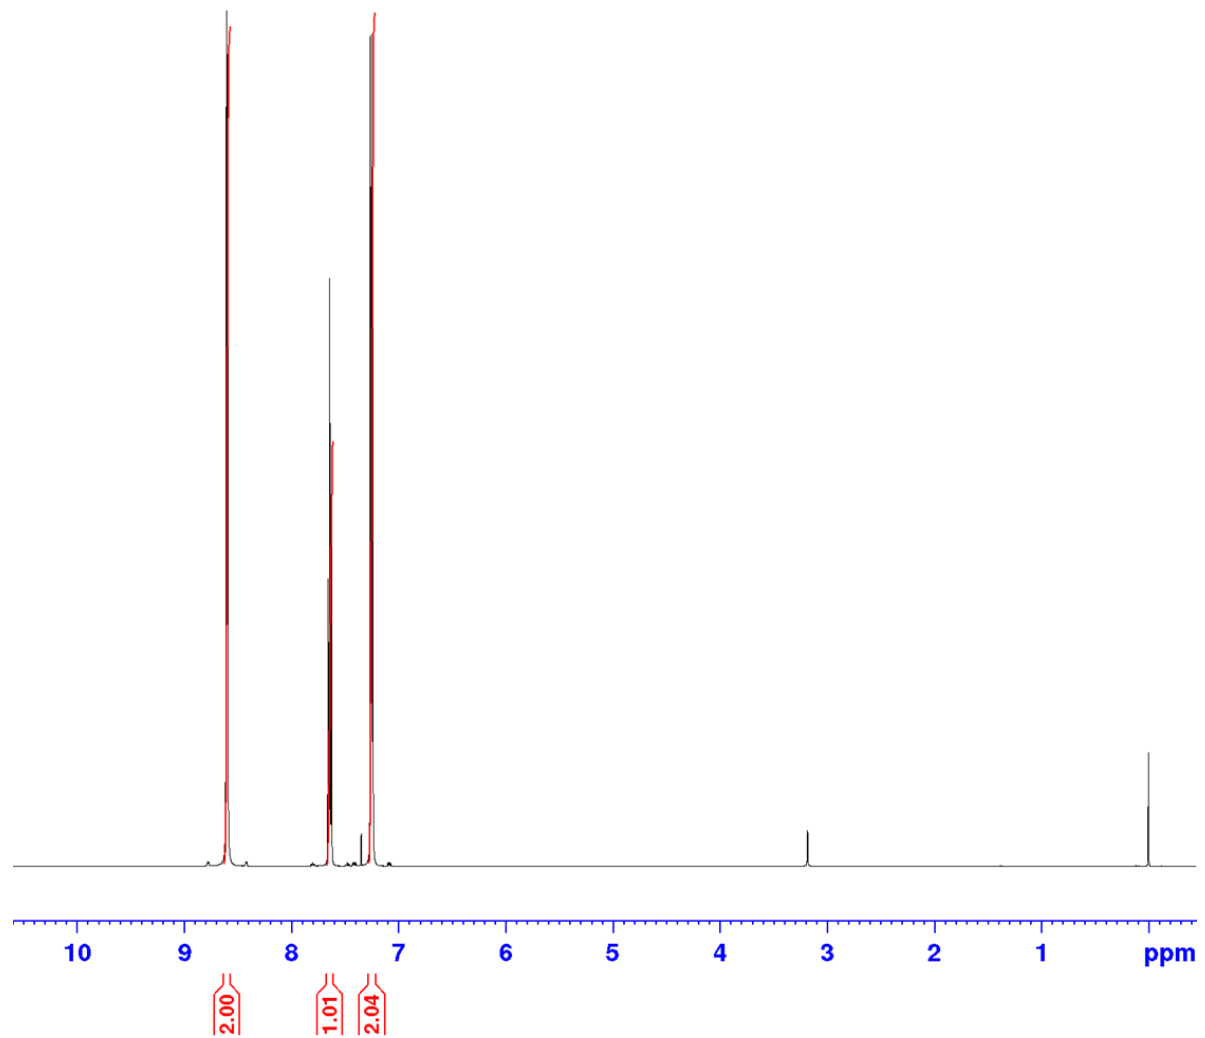

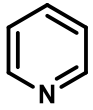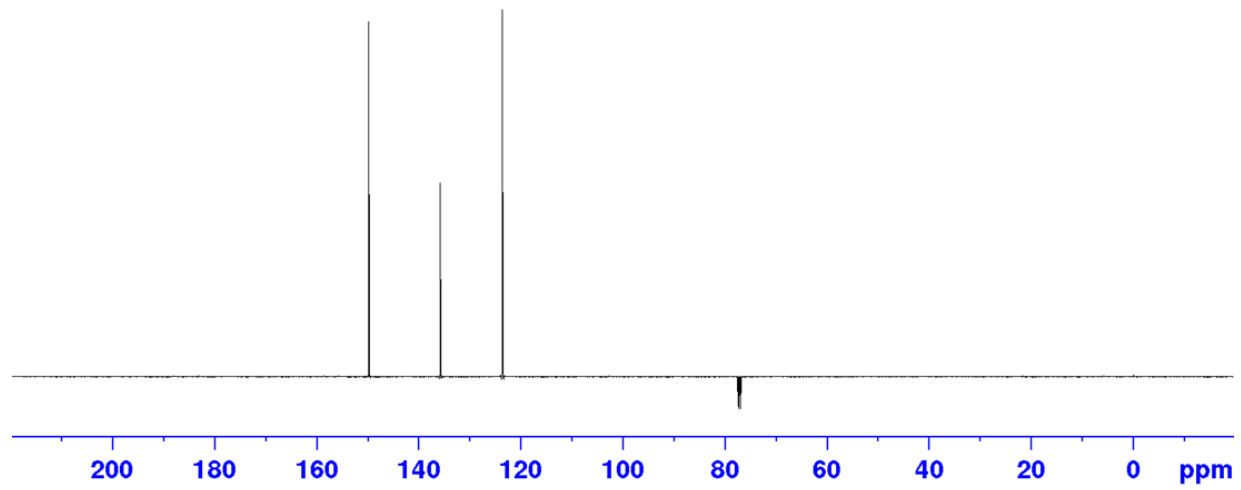

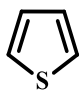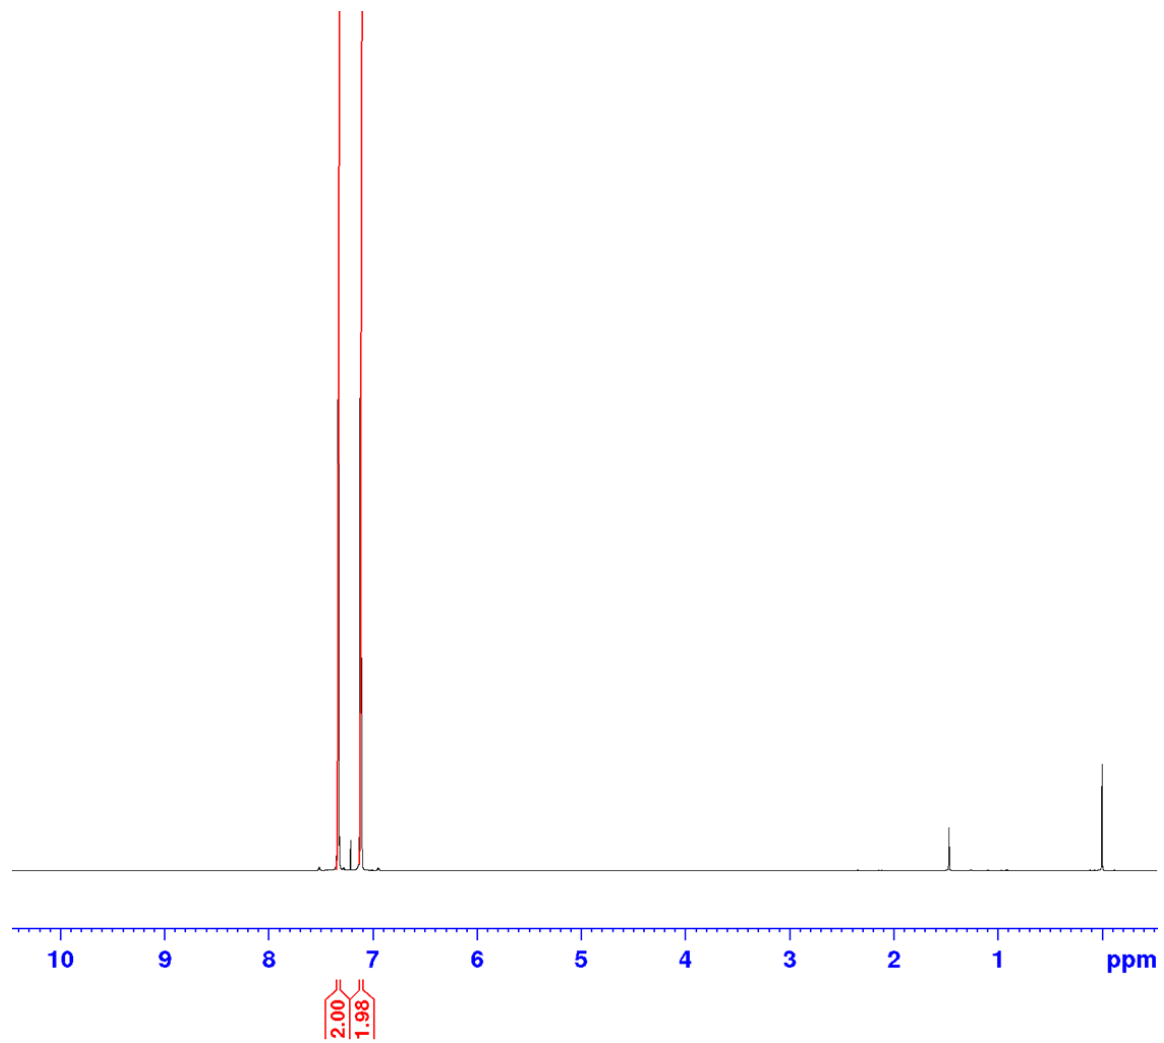



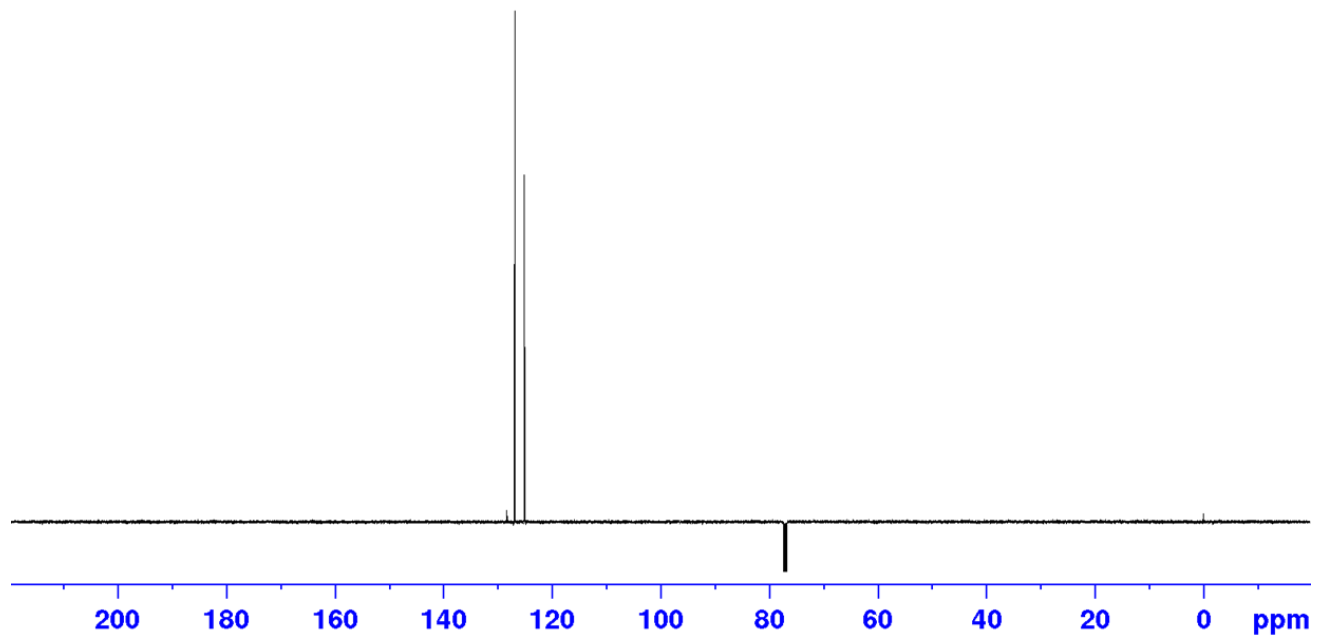

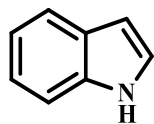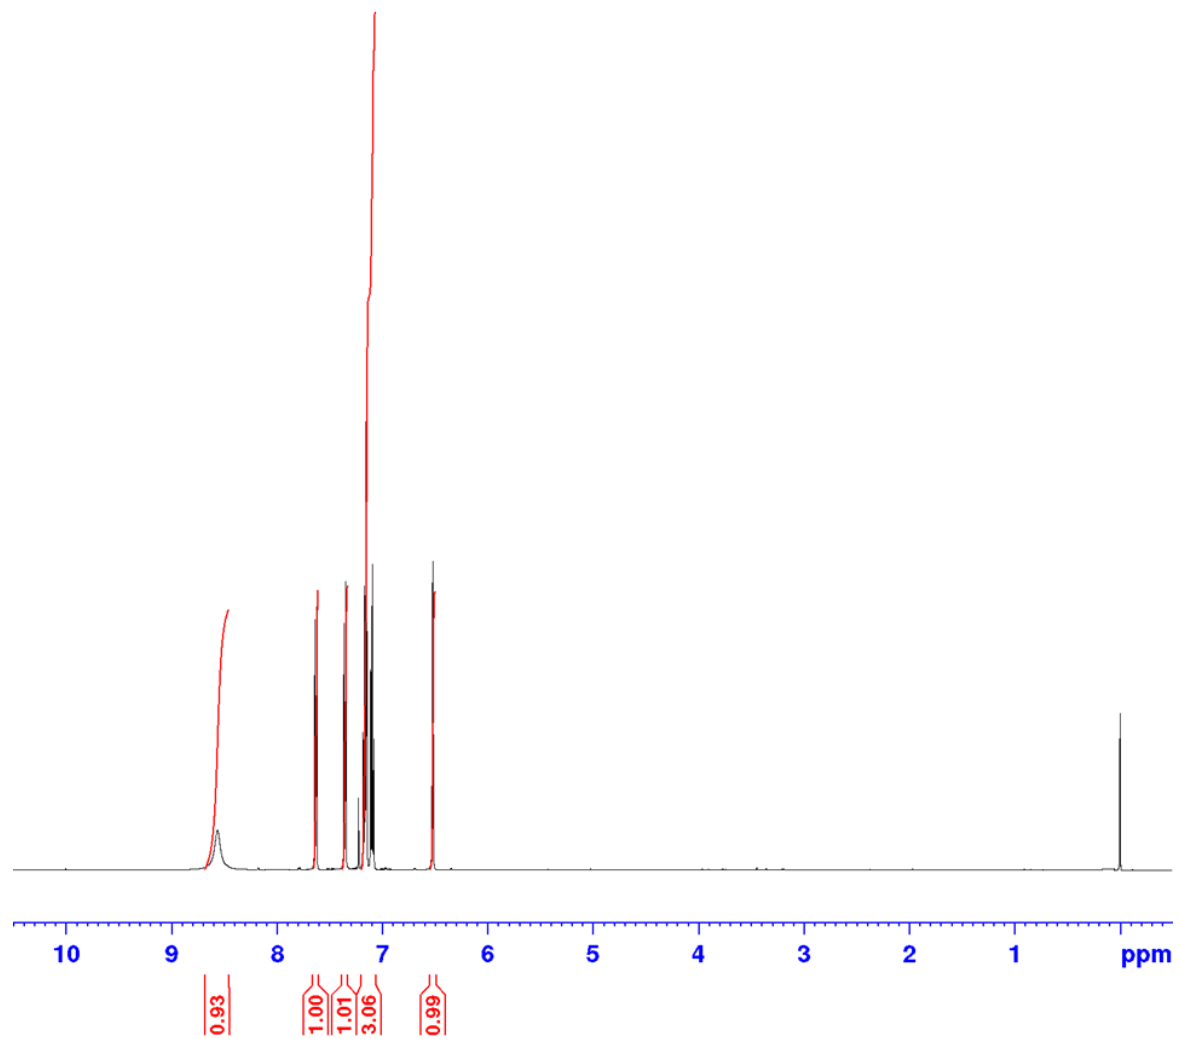

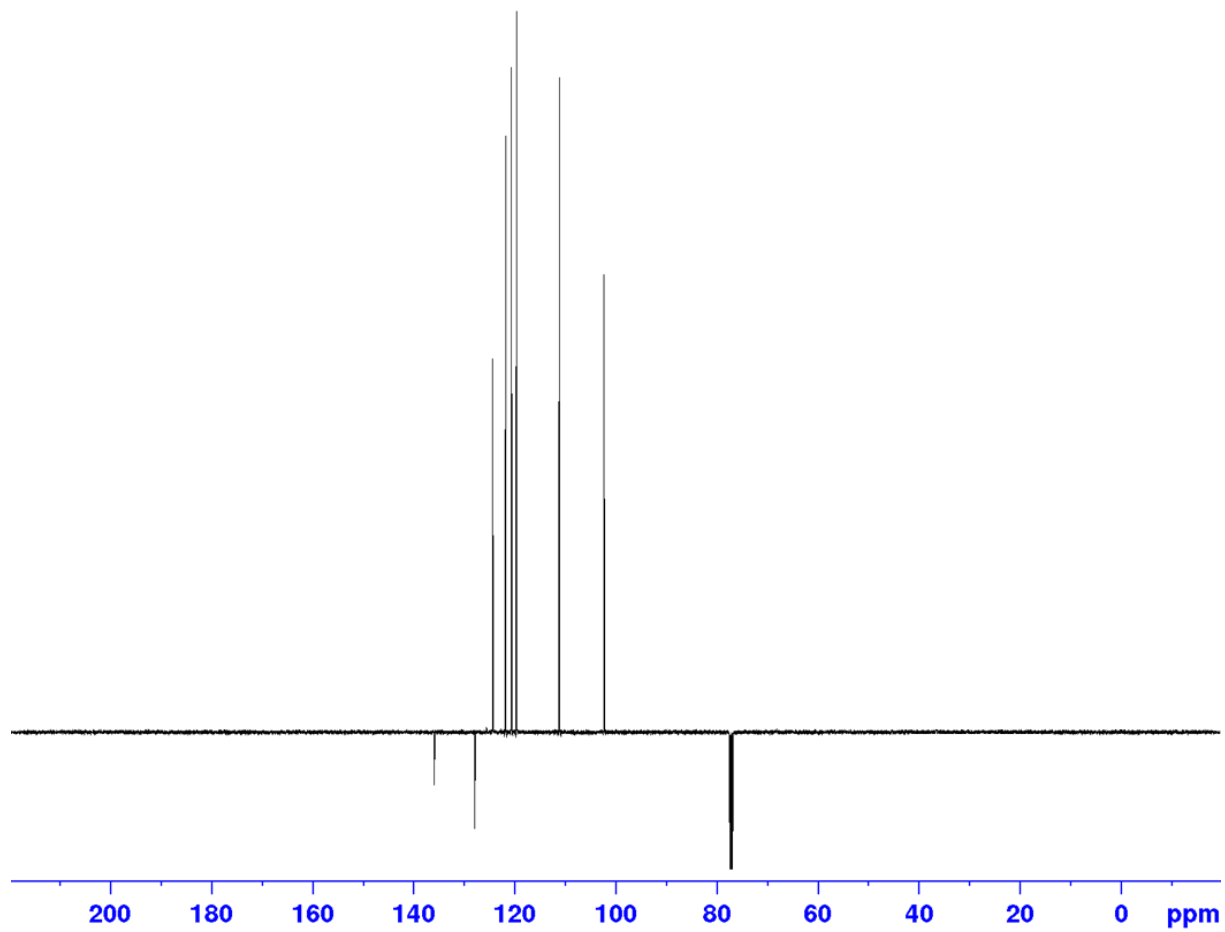

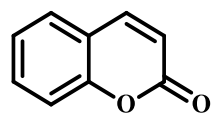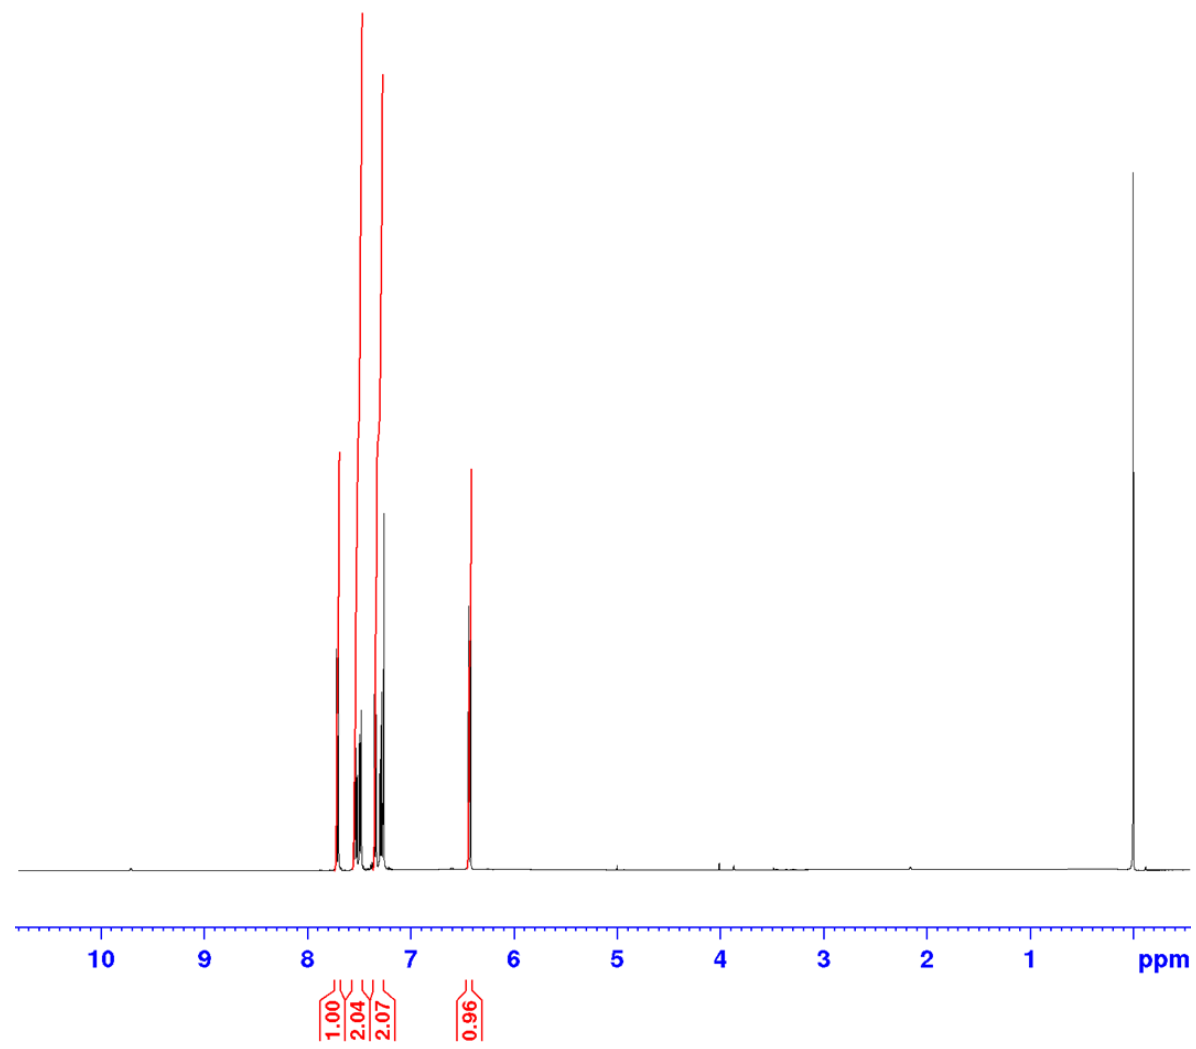

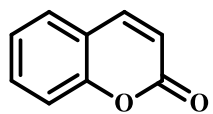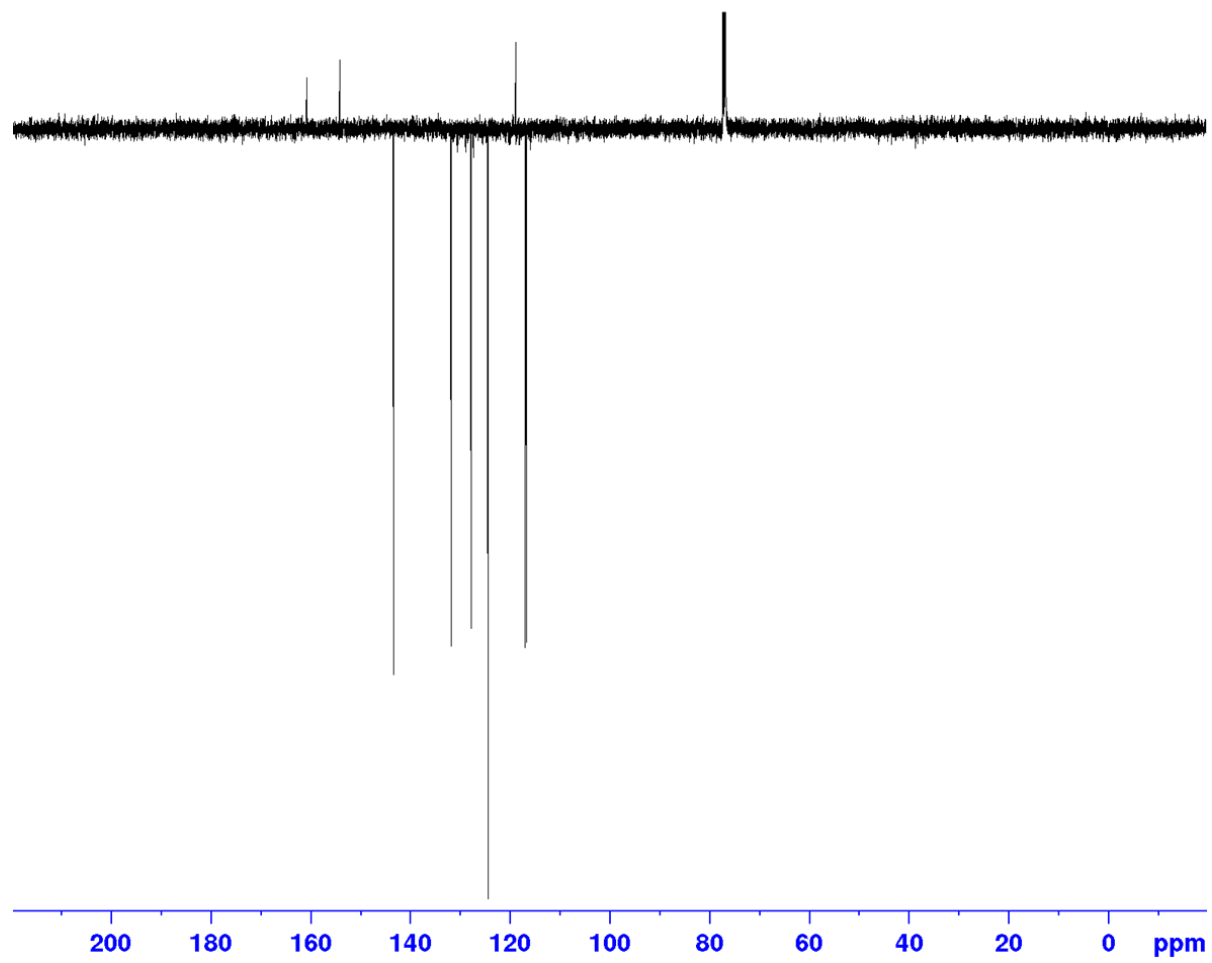

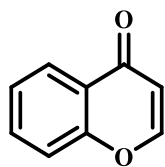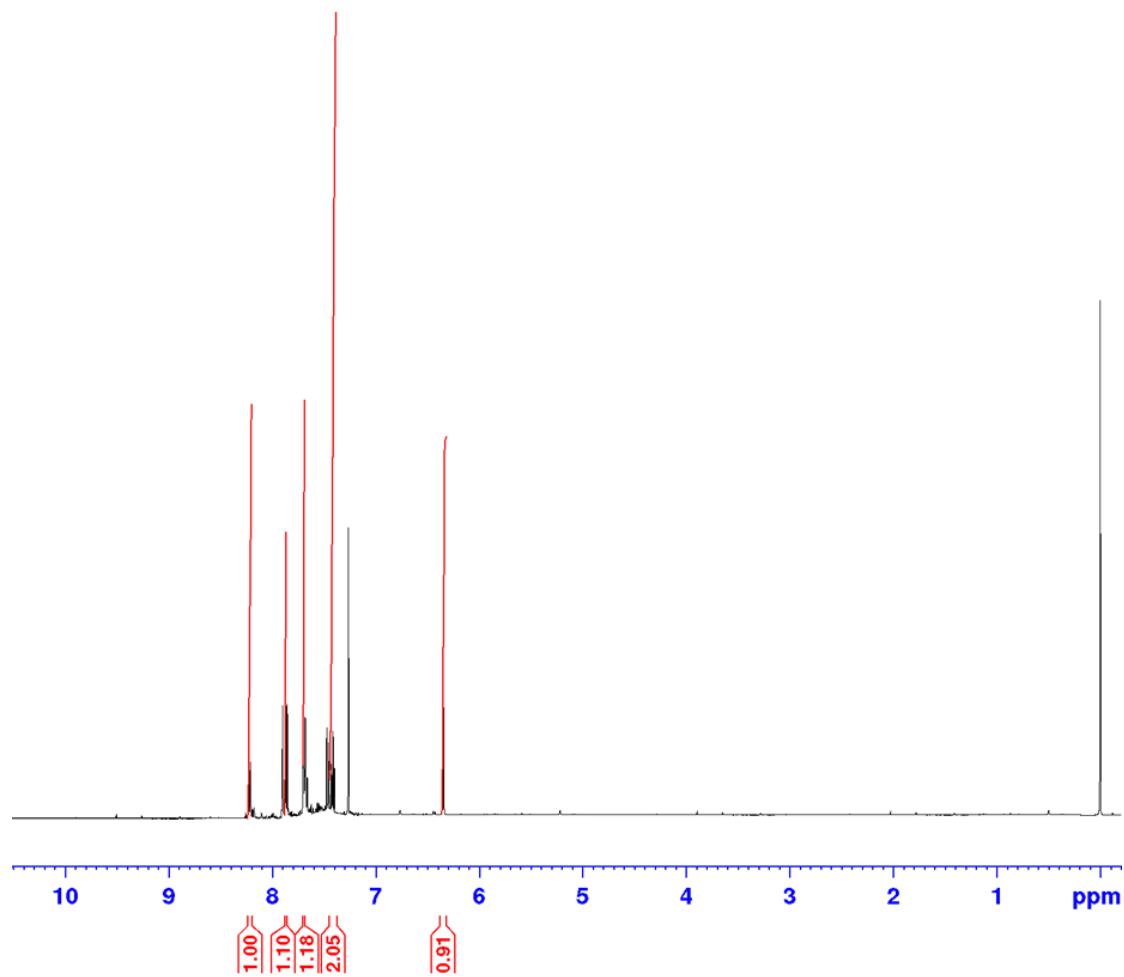

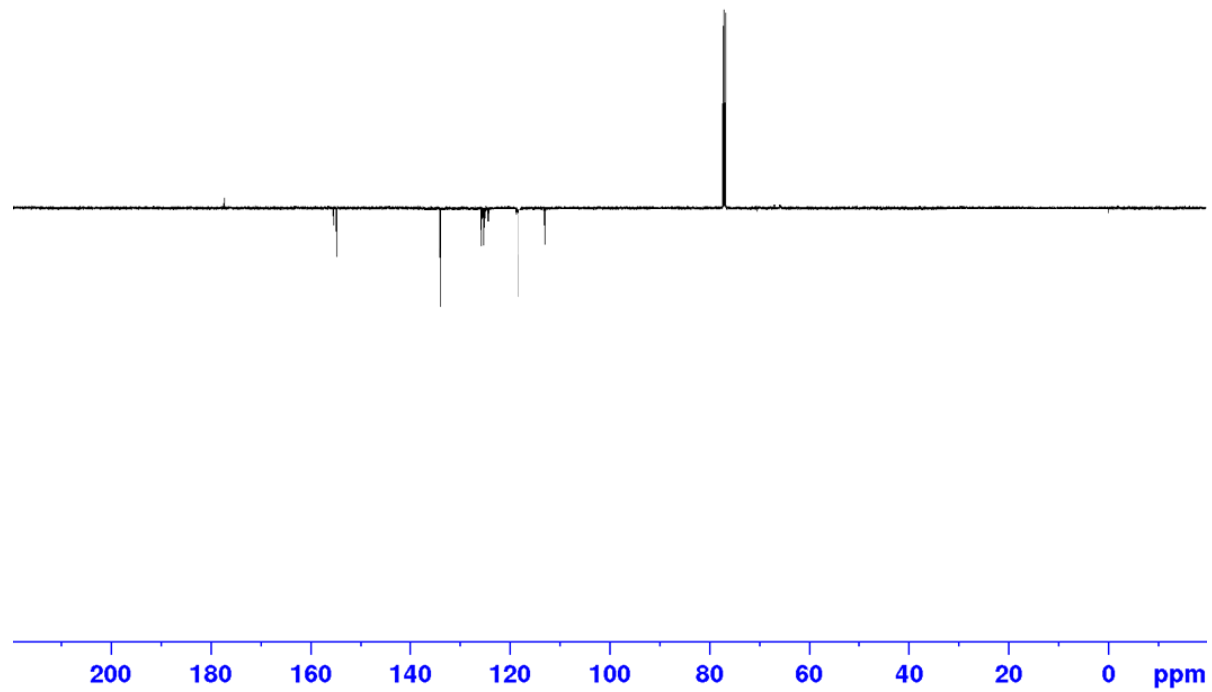

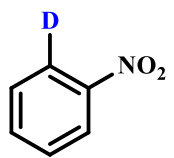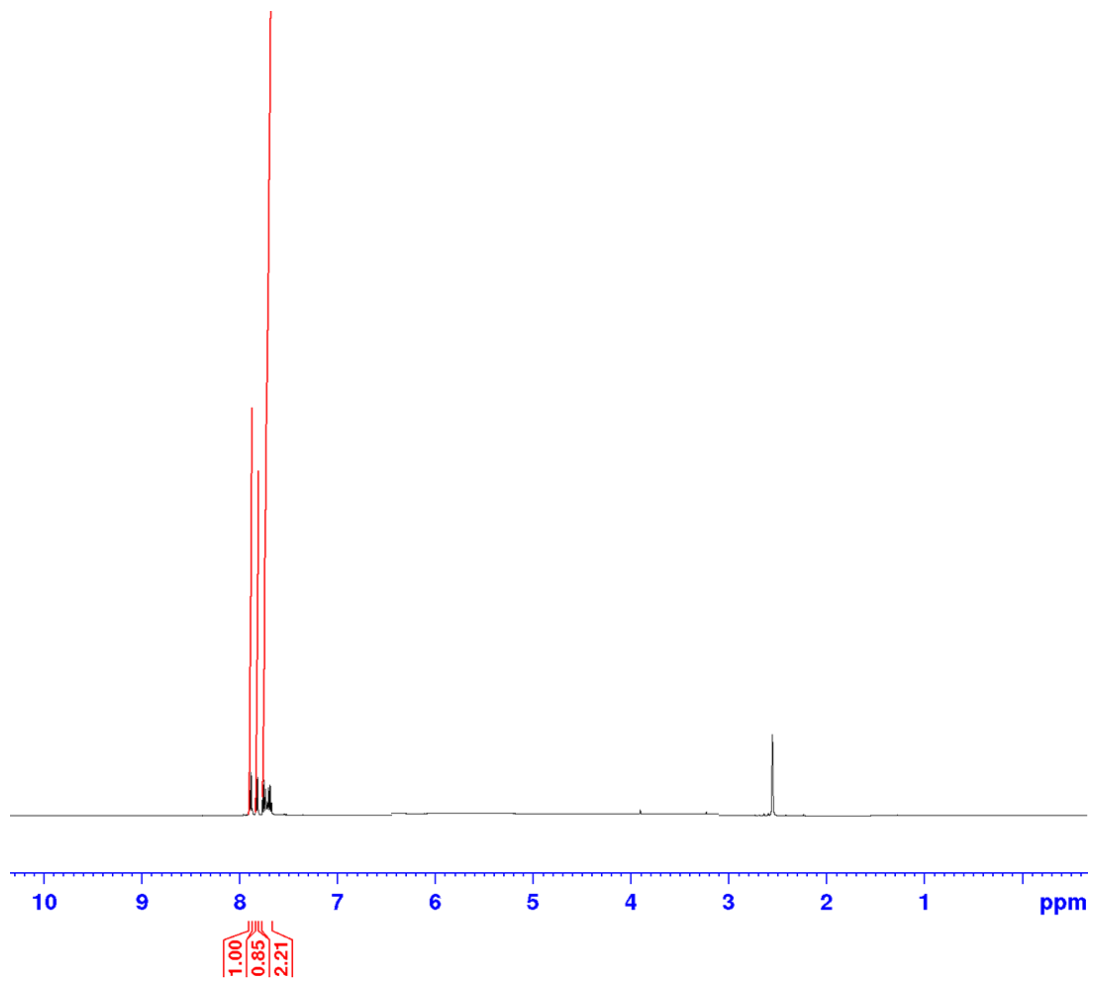



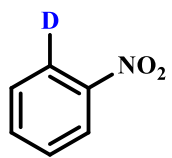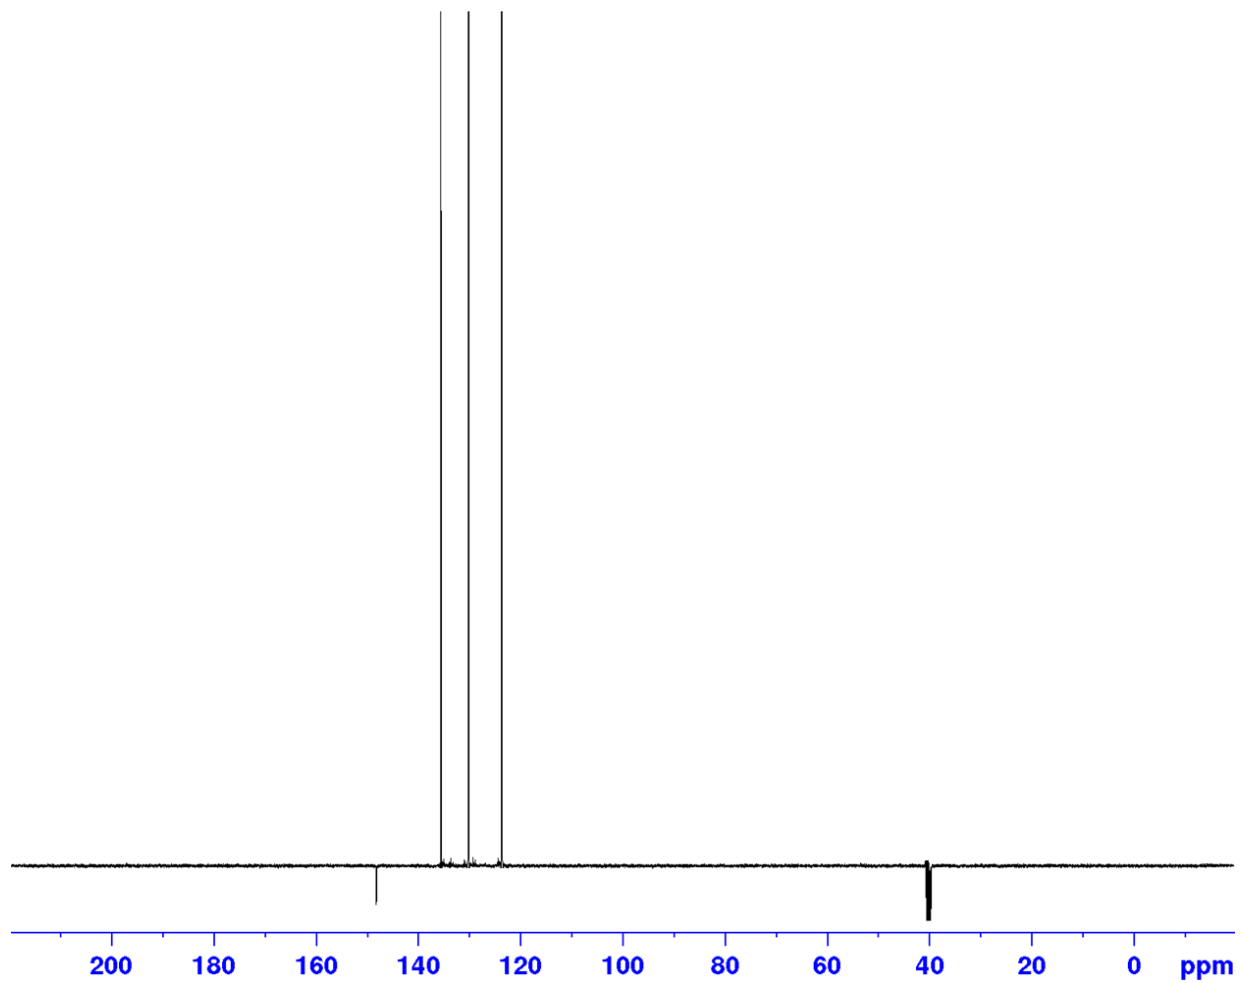

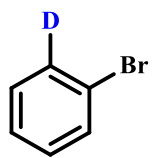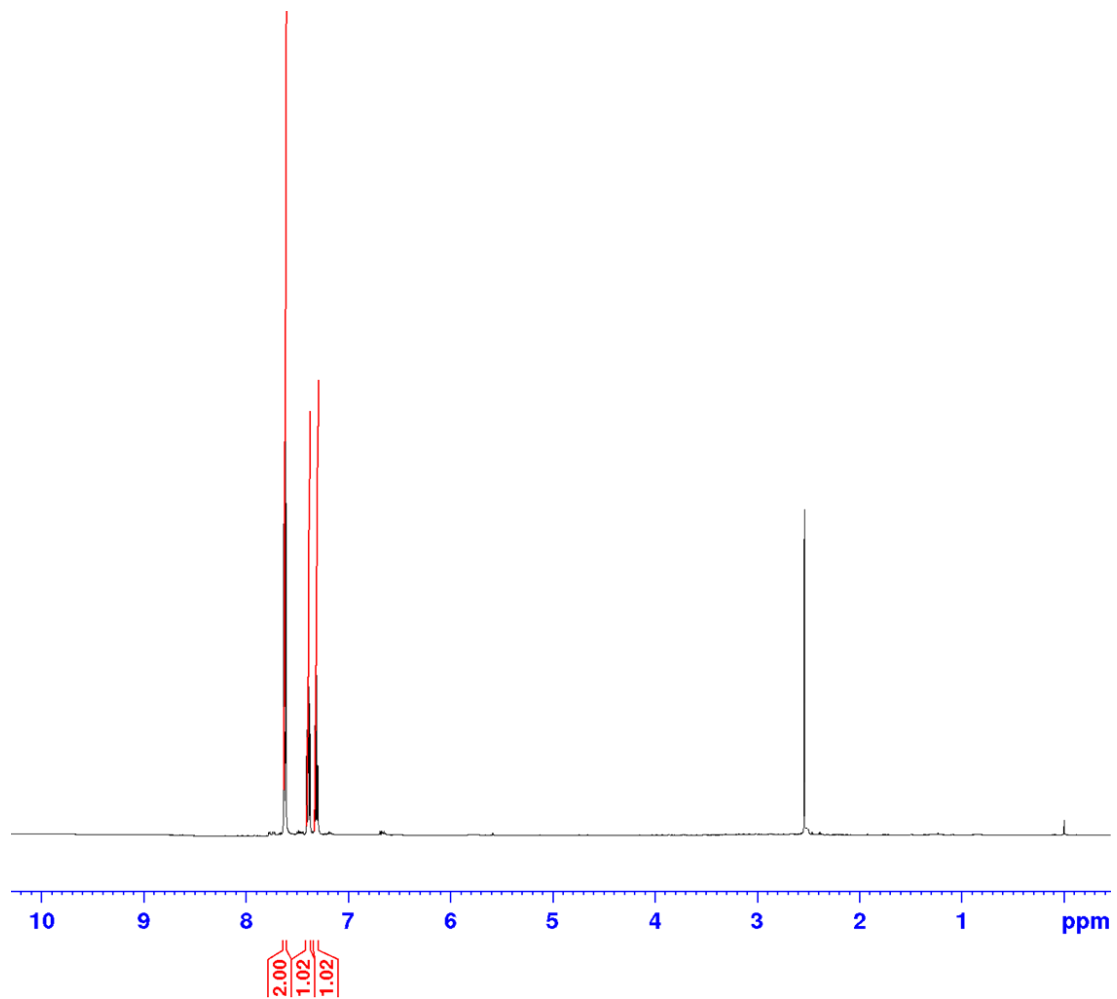

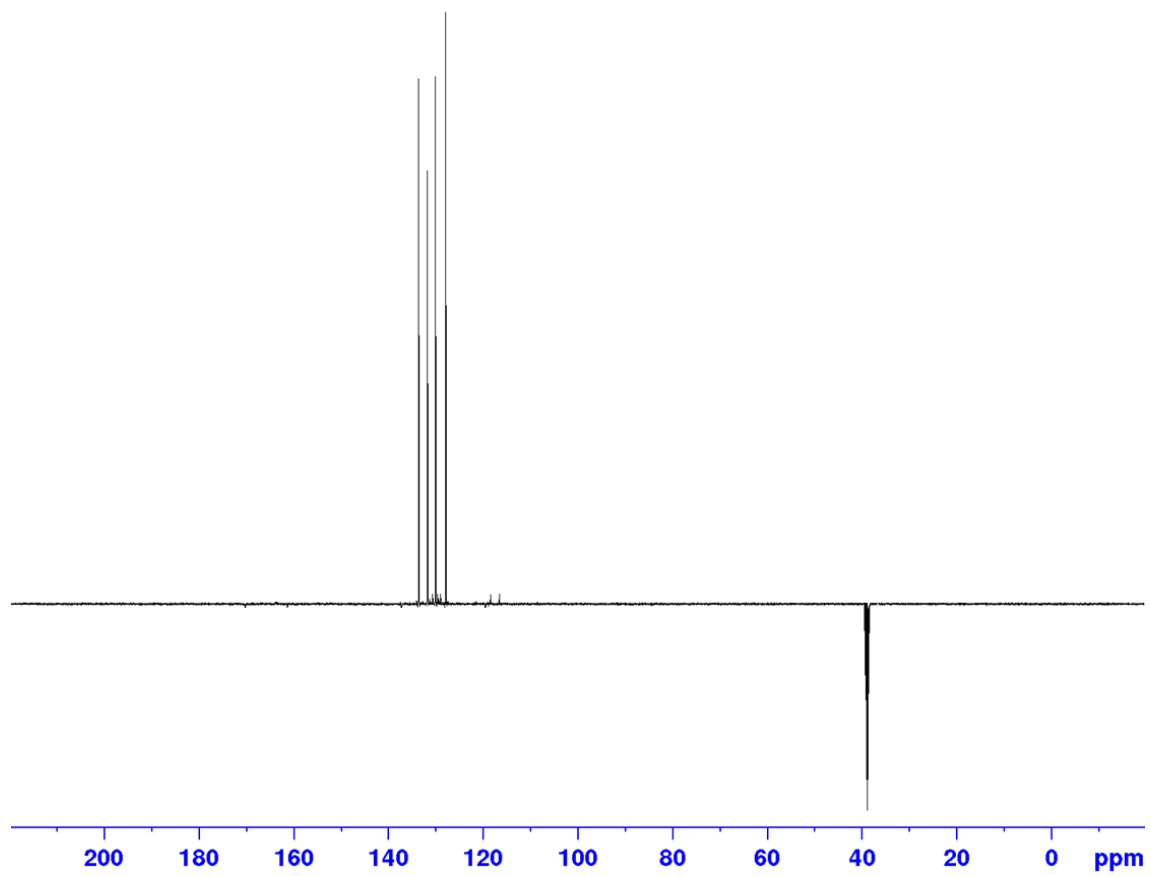

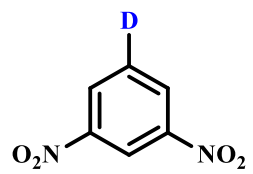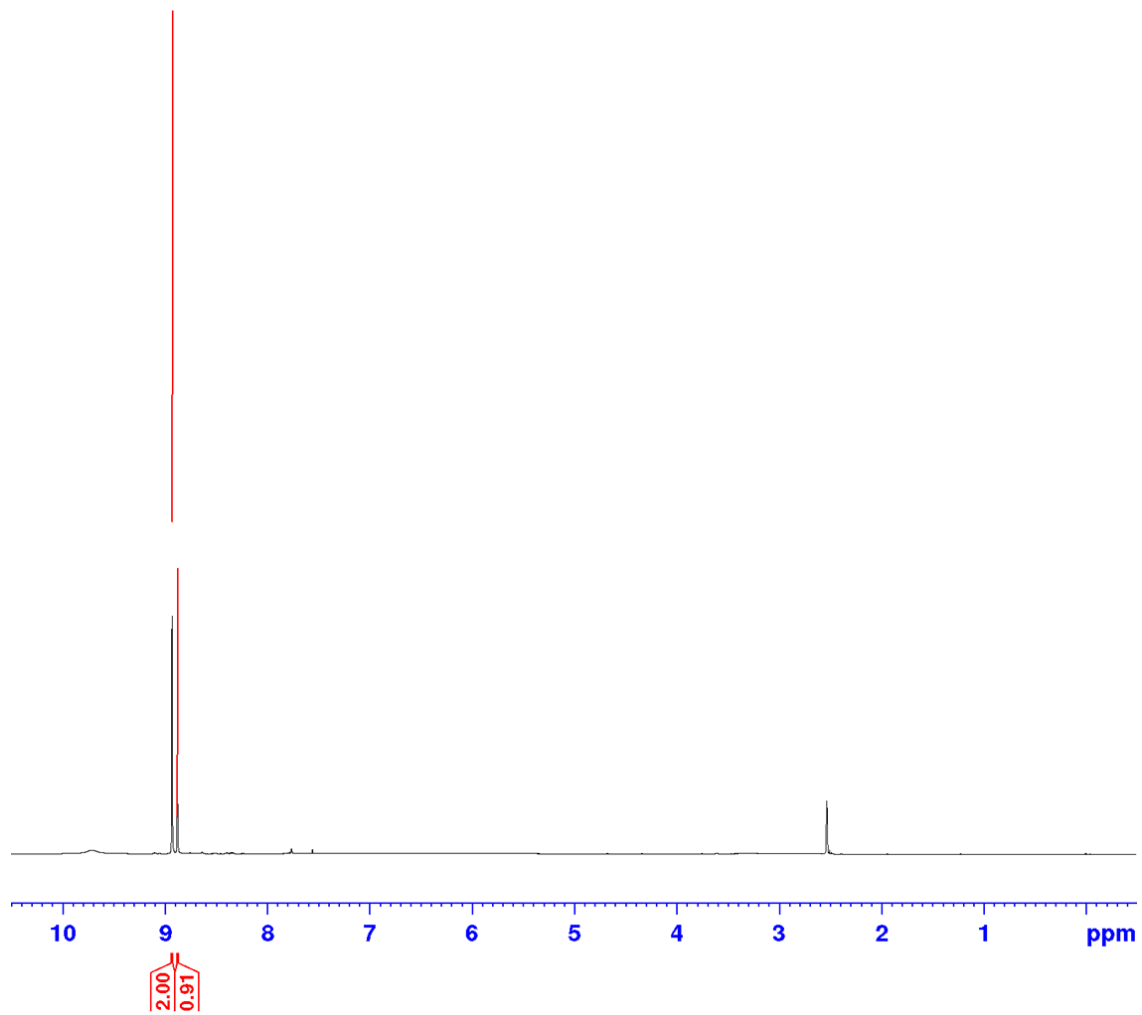

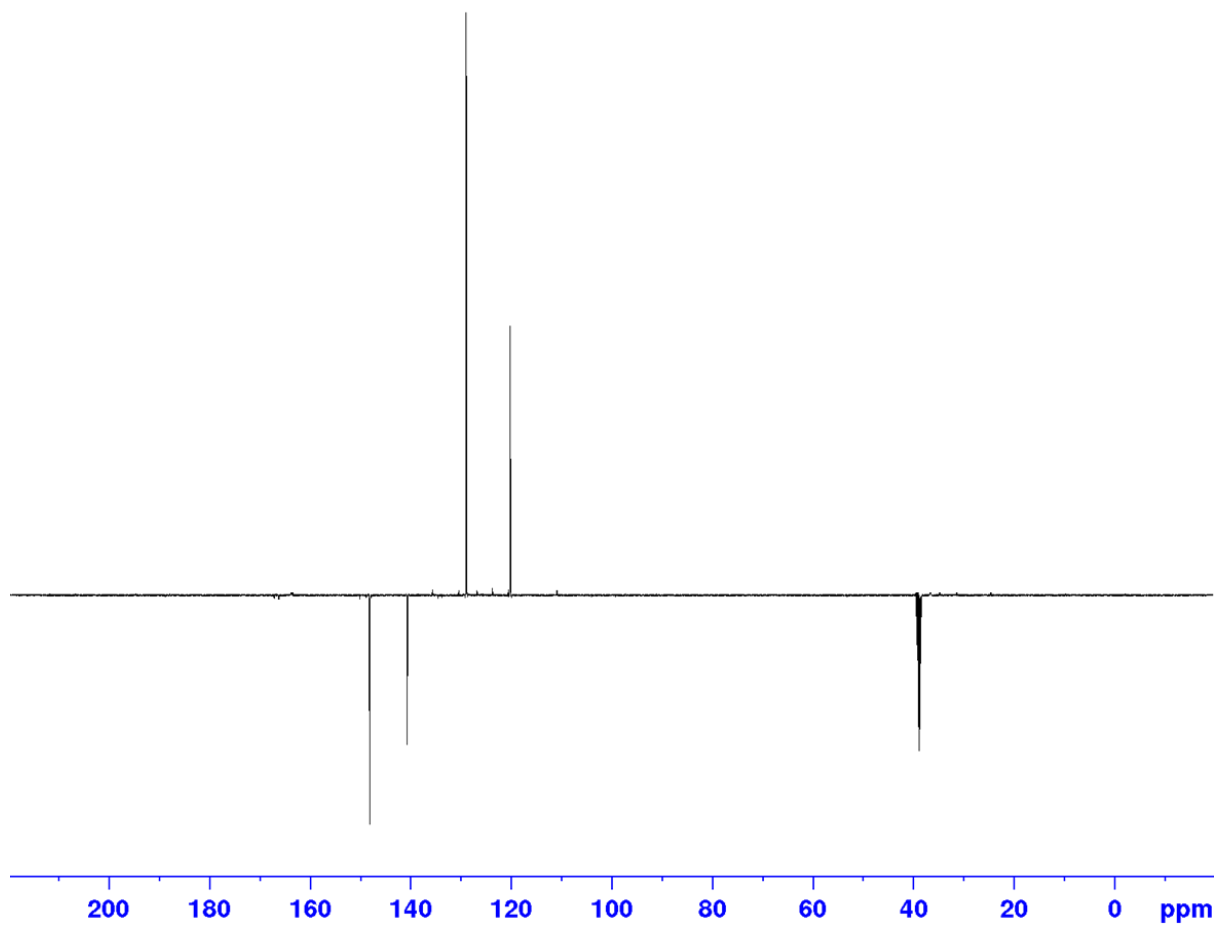

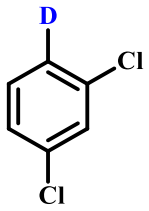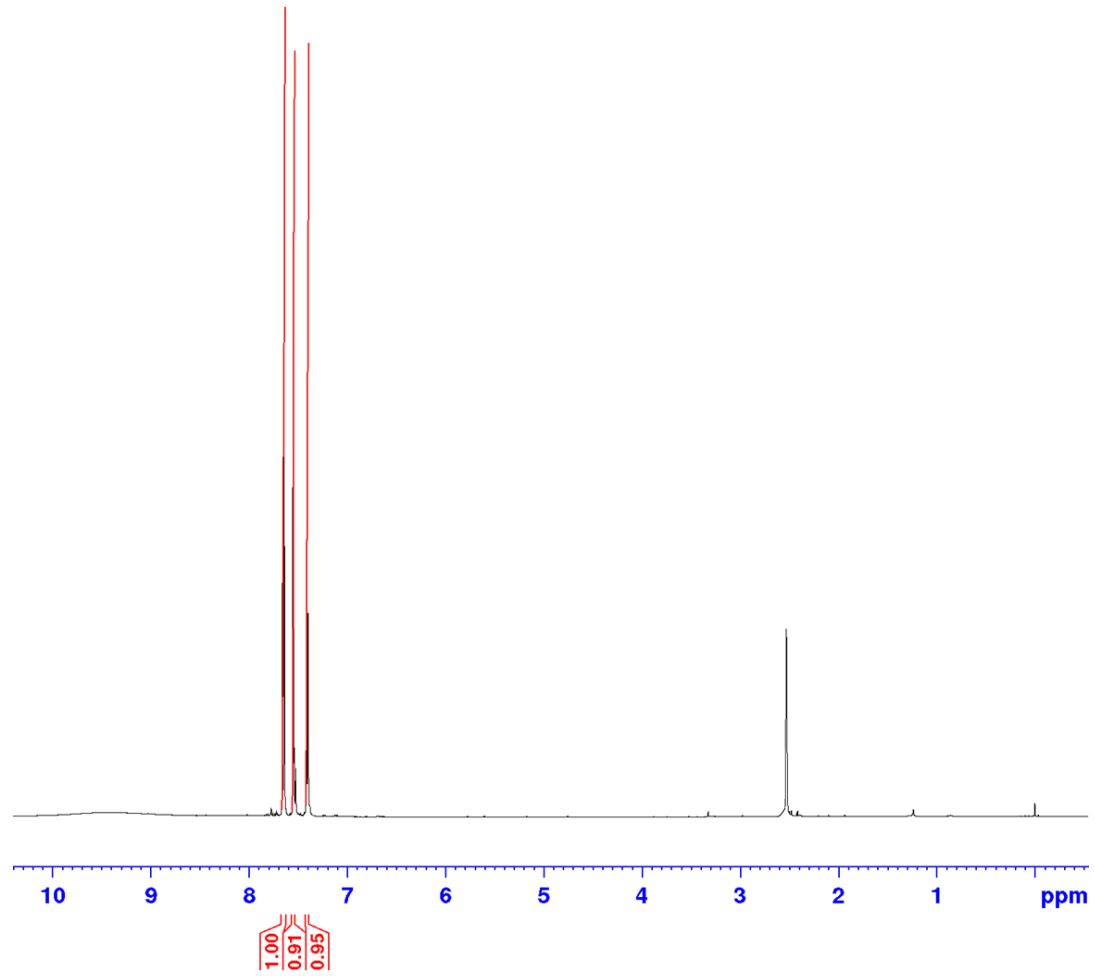

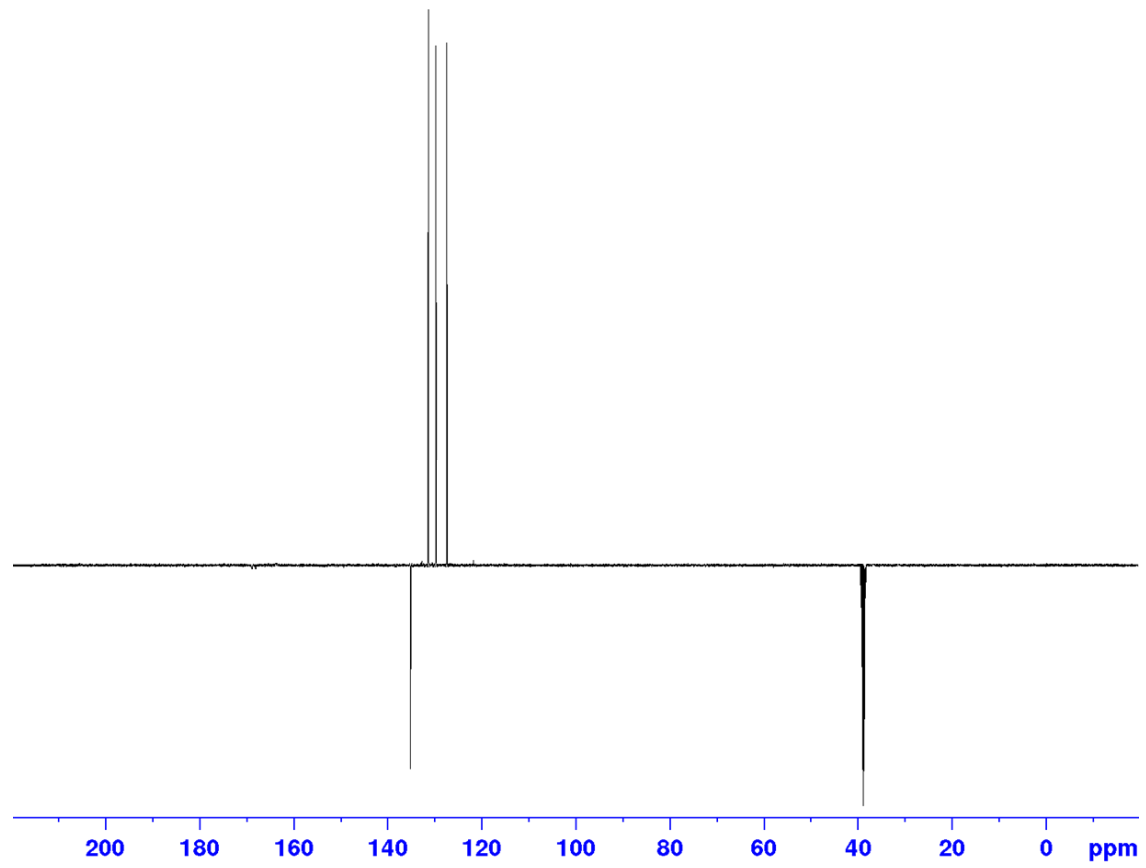

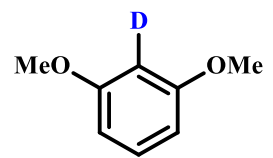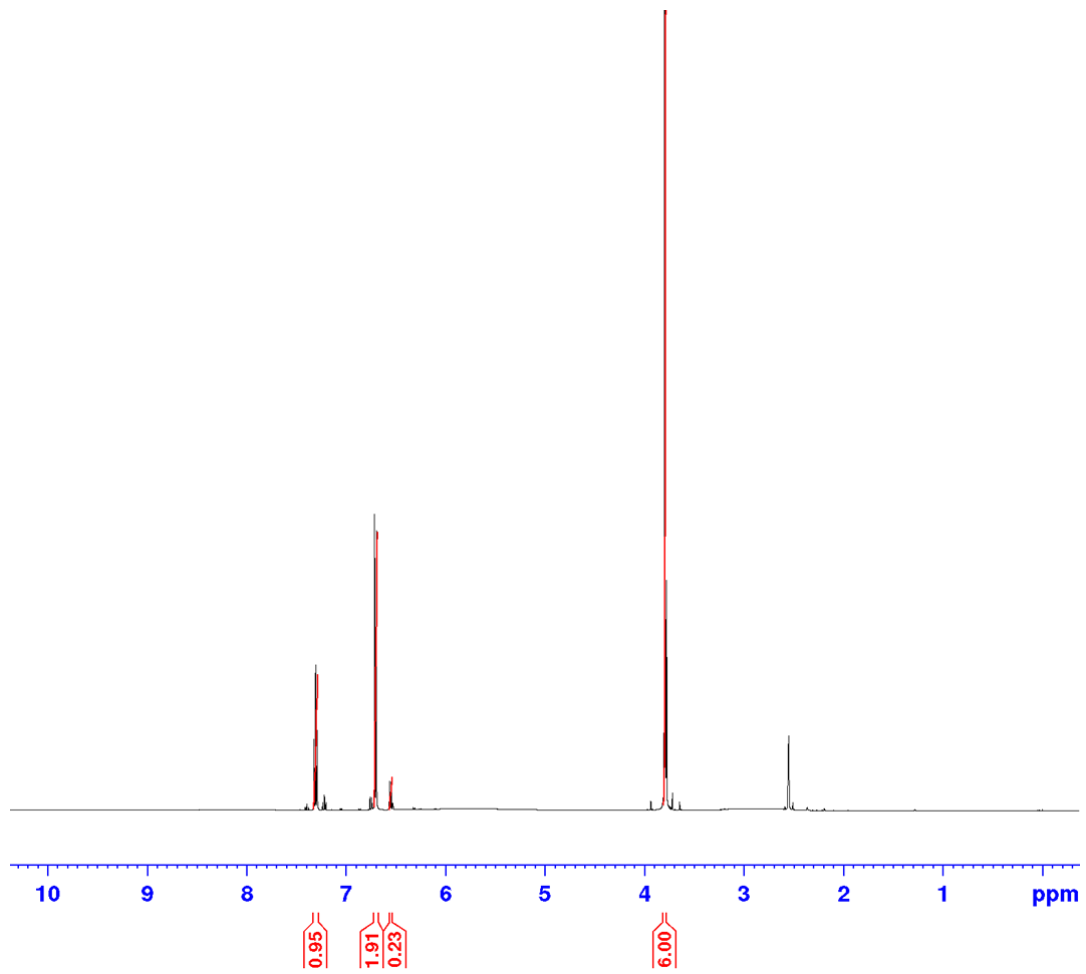



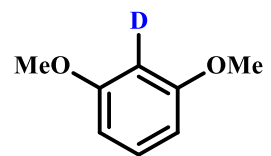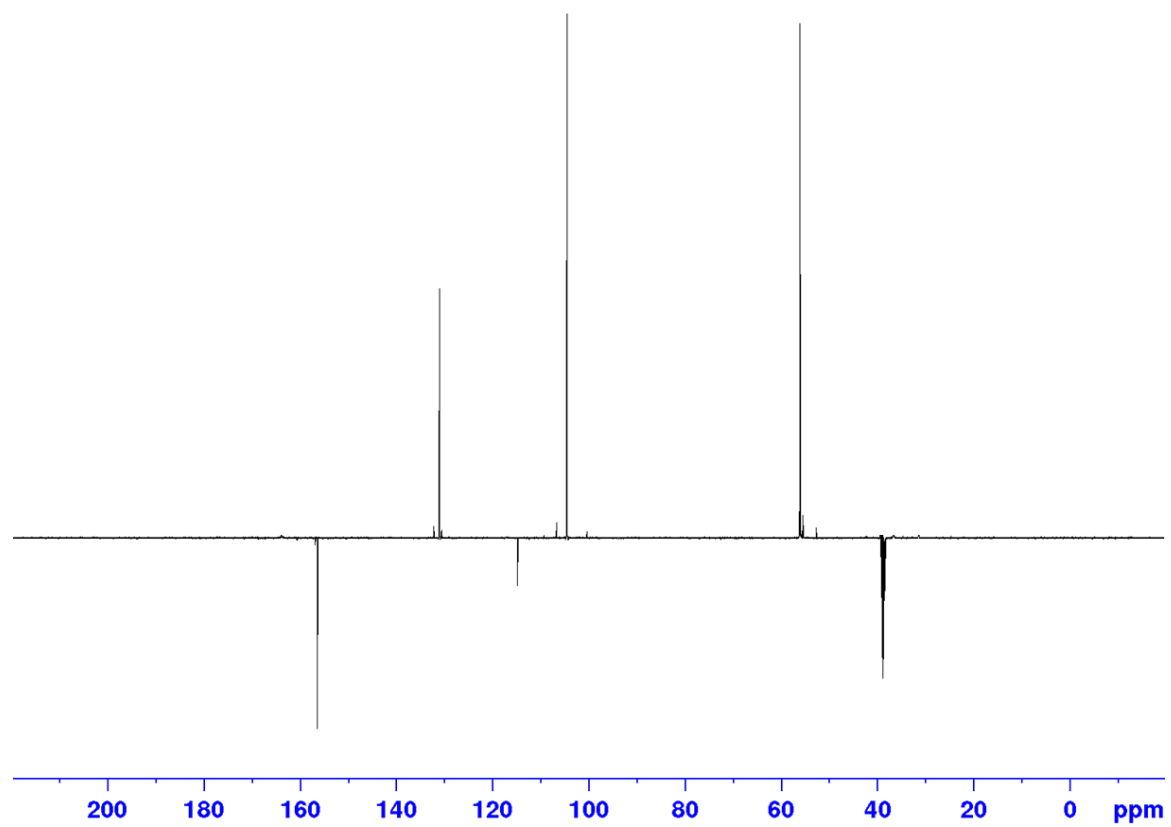

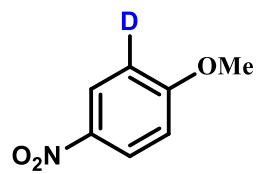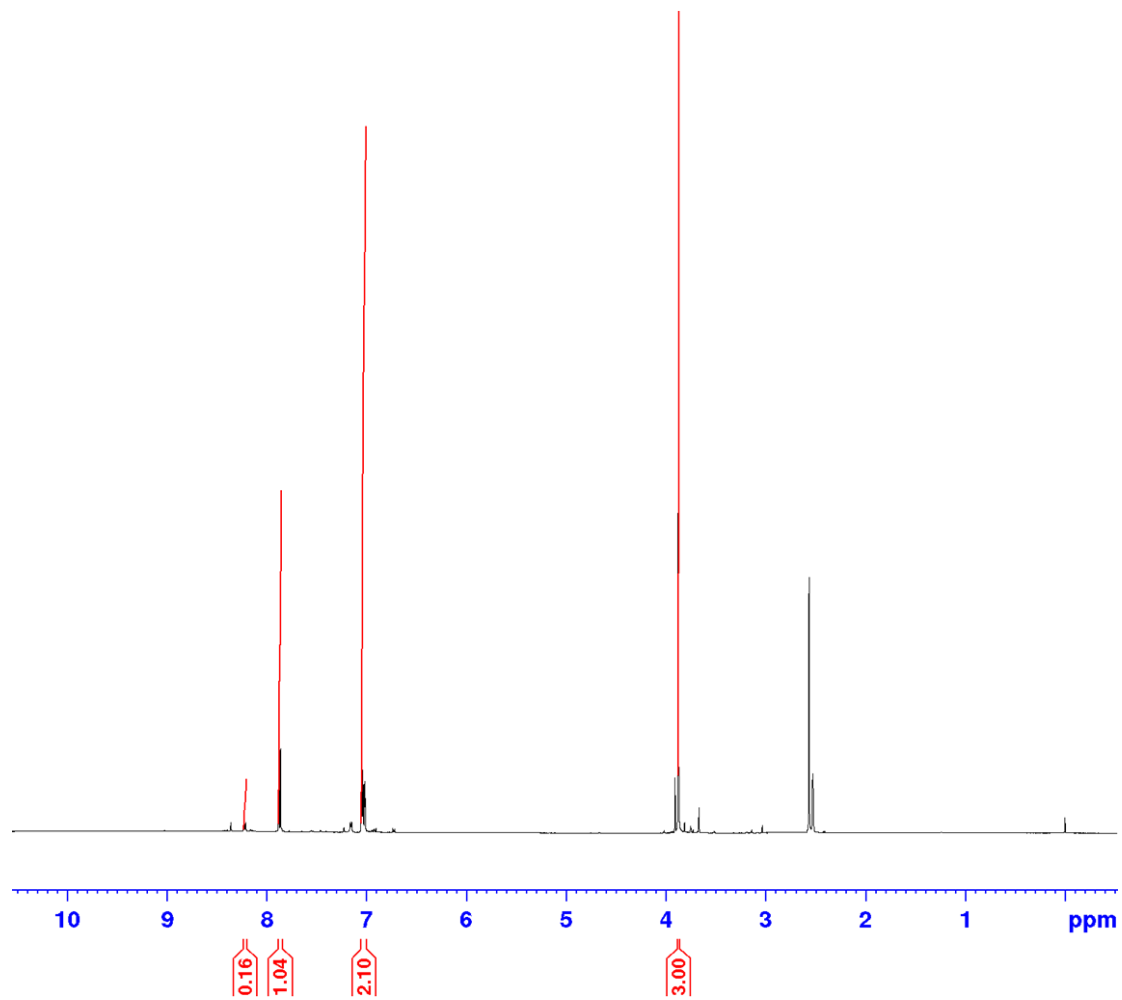

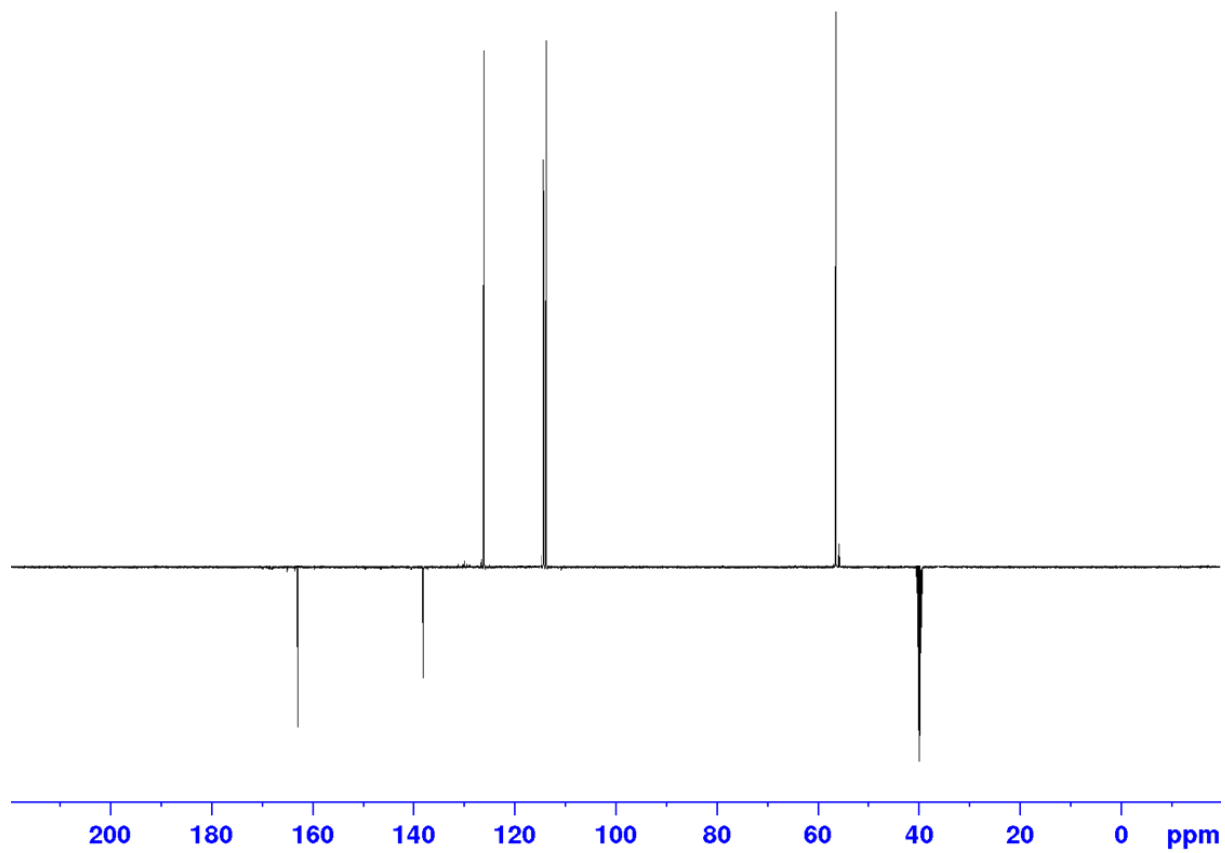

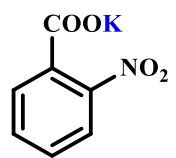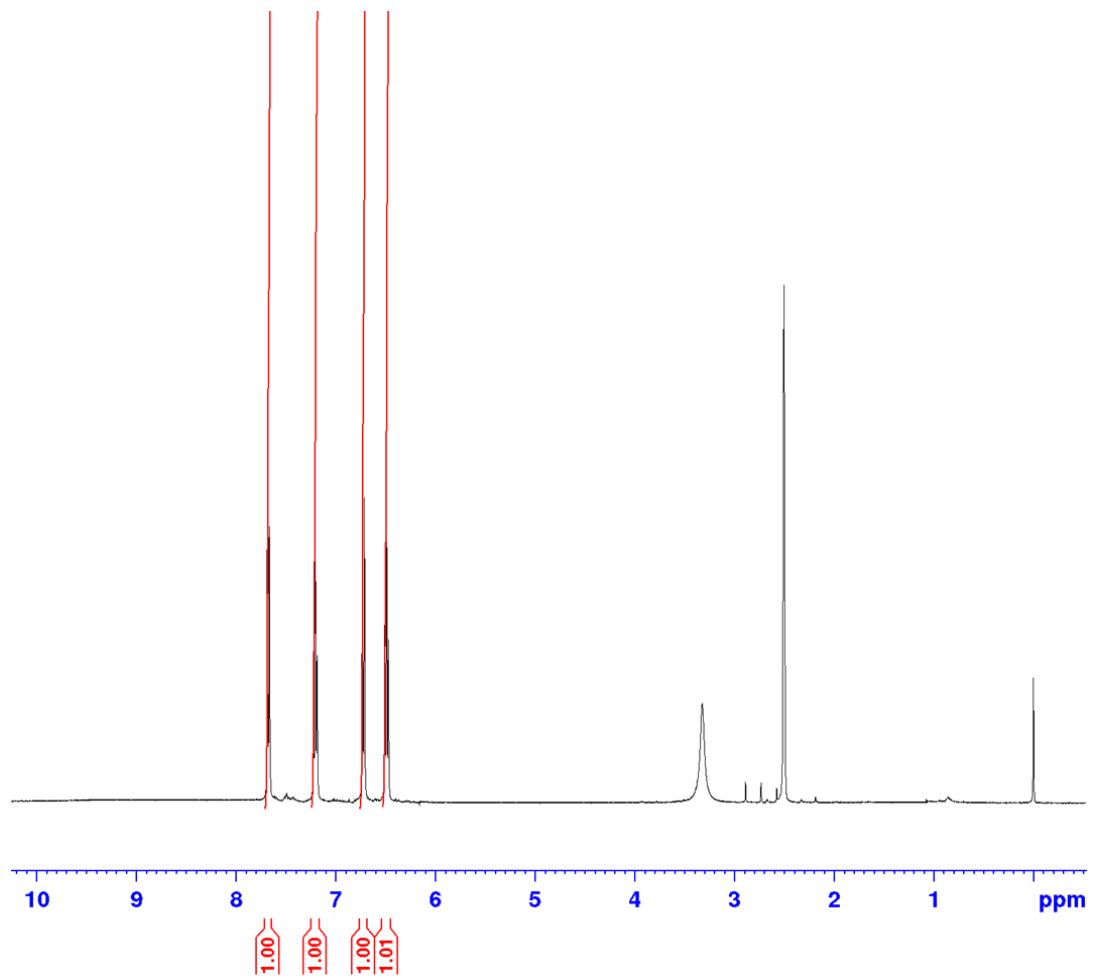

#### 4. References

1. S. Seo, J. B. Taylor and M. F. Greaney, *Chem. Commun.*, 2012, **48**, 8270–8272.
2. S. Dupuy and S. P. Nolan, *Chem. Eur. J.*, 2013, **19**, 14034–14038.
3. R. R. Behera, R. Ghosh, S. Panda, S. Khamari and B. Bagh, *Org. Lett.*, 2020, **22**, 3642–3648.
4. G. Cahiez, A. Moyeux, O. Gager and M. Poizat, *Adv. Synth. Catal.*, 2013, **355**, 790–796.
5. B. G. Reed-Berendt, N. Mast and L. C. Morrill, *Eur. J. Org. Chem.*, 2020, **9**, 1136–1140.
6. K.-S. Du and J.-M. Huang, *Green Chem.*, 2019, **21**, 1680–1685.
7. A. Dewanji, C. Mück-Lichtenfeld and A. Studer, *Angew. Chem. Int. Ed.*, 2016, **55**, 6749–6752.
8. X.-W. Zhang, G.-Q. Jiang, S.-H. Lei, X.-H. Shan, J.-P. Qu, and Y.-B. Kang, *Org. Lett.*, 2021, **23**, 1611–1615.
9. M. Kuriyama, N. Hamaguchi, G. Yano, K. Tsukuda, K. Sato and O. Onomura, *J. Org. Chem.*, 2016, **81**, 8934–8946.
10. P.-F. Wang, X.-Q. Wang, J.-J. Dai, Y.-S. Feng and H.-J. Xu, *Org. Lett.*, 2014, **16**, 4586–4589.
11. D. Hackenberger, B. Song, M. F. Grünberg, S. Farsadpour, F. Menges, H. Kelm, C. Groß, T. Wolff, G. Niedner-Schatteburg, W. R. Thiel and L. J. Gooßen, *ChemCatChem*, 2015, **7**, 3579–3588.
